# Supplementary material for: The ‘Eigenständig werden’ prevention trial: a cluster randomised controlled study on a school-based life skills programme to prevent substance use onset
Source: PubMed Central journal article supplement — BMJ Open. 2011 Nov 1;1(2):e000352. doi: 10.1136/bmjopen-2011-000352 (PMC3208900; doi:10.1136/bmjopen-2011-000352), 2011-11-01
Supplement: bmjopen-2011-000352.draft_revisions.pdf [file bmjopen-2011-000352.draft_revisions.pdf]

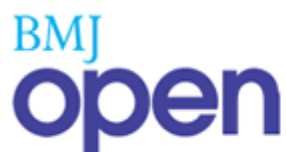

**The „Eigenständig werden“ prevention trial: a cluster randomised controlled study on a school-based life skills programme to prevent substance use onset.**

|                                 |                                                                                                                                                                                                                                                                                               |
|---------------------------------|-----------------------------------------------------------------------------------------------------------------------------------------------------------------------------------------------------------------------------------------------------------------------------------------------|
| Journal:                        | <i>BMJ Open</i>                                                                                                                                                                                                                                                                               |
| Manuscript ID:                  | bmjopen-2011-000352                                                                                                                                                                                                                                                                           |
| Article Type:                   | Research                                                                                                                                                                                                                                                                                      |
| Date Submitted by the Author:   | 26-Aug-2011                                                                                                                                                                                                                                                                                   |
| Complete List of Authors:       | Hansen, Julia; Institute for Therapy and Health Research, IFT-Nord<br>Hanewinkel, Reiner; Institute for Therapy and Health Research, IFT-Nord<br>Maruska, Karin; Institute for Therapy and Health Research, IFT-Nord<br>Isensee, Barbara; Institute for Therapy and Health Research, IFT-Nord |
| <b>Primary Subject Heading</b>: | Public health                                                                                                                                                                                                                                                                                 |
| Keywords:                       | School-based prevention programme, general life skills, substance use                                                                                                                                                                                                                         |
|                                 |                                                                                                                                                                                                                                                                                               |

SCHOLARONE™  
Manuscripts

1  
2  
3 The „Eigenständig werden“ prevention trial: a cluster randomised controlled study on a  
4 school-based life skills programme to prevent substance use onset  
5  
6  
7

8  
9 Study protocol and baseline characteristics  
10  
11

12  
13 Julia Hansen, Reiner Hanewinkel, Karin Maruska & Barbara Isensee  
14  
15

16  
17  
18 Corresponding author:  
19

20 Julia Hansen  
21

22 Institute for Therapy and Health Research, IFT-Nord  
23

24 Harmsstr. 2  
25

26 24114 Kiel  
27

28 Germany  
29

30 Phone +49-431-570-29-37  
31

32 Fax +49-431-570-29-29  
33  
34  
35

36  
37 E-mail addresses  
38

39 Julia Hansen hansen@ift-nord.de  
40

41 Reiner Hanewinkel hanewinkel@ift-nord.de  
42

43 Karin Maruska maruska@ift-nord.de  
44

45 Barbara Isensee isensee@ift-nord.de  
46  
47  
48  
49

50 Key words  
51

52 School-based prevention programme, life skills, substance use  
53  
54  
55

56 Word count  
57

58 3815  
59  
60

## ABSTRACT

### Background

The aim of this study is the implementation and evaluation of “Eigenständig werden 5+6” (“Becoming Independent 5+6”), a school-based curriculum for grade 5 and 6 developed upon evidence-based criteria for effective drug prevention curricula in schools. Evaluation of the programme includes efficacy, feasibility, and practicability in daily school routine.

### Methods and analysis

The intervention “Eigenständig werden 5+6” consists of 14 teaching units evenly distributed over grades five and six which are interactively delivered, and a parent component.

Programme effects are studied in a four wave cluster randomised controlled trial with two arms, an intervention and a control condition. Self-completed questionnaires from students and teachers are collected by trained research staff.

45 schools, 172 classes and 3,444 students with a mean age of 10.37 years (SD=.59) and 47.9% girls from four federal states in Germany were assessed at baseline. 1,685 students in 81 classes were assigned to intervention classes, 1,759 students in 91 classes to control arm.

No differences between conditions were either found for age, gender, immigration background, socio-economic status, substance use, or life skills at baseline. Exceptions are higher self-efficacy ( $t_{(3438)}=2.34$ ,  $p=.02$ ,  $d=.08$ ) and empathy ( $t_{(3302)}=2.4$ ,  $p=.02$ ,  $d=.09$ ) reported for control group whereas class climate seems better in intervention condition ( $t_{(3037)}=2.01$ ,  $p=.05$ ,  $d=.07$ ), but effect sizes state marginal differences.

### Ethics and dissemination

Ethical approval was granted by the Ethics Committee of the Medical Faculty of the University of Kiel. The study was approved by respective Ministries of Education.

## Conclusion

Baseline data suggest that the initial conditions are favourable for testing programme efficacy since distribution of baseline levels of the outcomes does not differ in intervention and control condition, except negligible differences between self-efficacy and empathy higher in the control group and class climate higher in the intervention group.

**Trial registration:** Current Controlled Trials ISRCTN99442407

For peer review only

1  
2  
3 ARTICLE SUMMARY  
4  
5  
6  
7

8 Article focus  
9

- 10 - The focus of this study is to implement and evaluate a school-based curriculum for  
11 students in grade five and six, developed upon evidence-based criteria for effective  
12 drug prevention curricula in schools.  
13  
14  
15  
16 - It is hypothesised that the intervention will lead to an increase of general life skills,  
17 refusal skills, and knowledge about substance use. These enhancements should be  
18 accompanied by a lower likelihood of smoking onset and alcohol consumption.  
19  
20  
21  
22

23 Key messages  
24

- 25 - Due to inconsistent results concerning long-term effects and effective programme  
26 components of school-based prevention programmes, there is a need for further  
27 research in this field. This trial addresses this need.  
28  
29  
30  
31  
32  
33

34 Strengths and limitations  
35

36 Strengths:  
37

- 38 - This cluster randomised controlled trial includes a large sample of adolescents.  
39  
40 - A wide spectrum of outcomes and confounders will be assessed in four waves  
41 including not only post-test but also follow-up.  
42  
43  
44

45 Limitations:  
46

- 47 - Self-reports of students may be a limiting factor to this study.  
48  
49  
50  
51  
52  
53  
54  
55  
56  
57  
58  
59  
60

## BACKGROUND

### Introduction

Albeit lifetime smoking prevalence at the age between 12 and 17 years has declined in Germany over the last decade [1], substance abuse is still one of the major threats to adolescent's health in Germany and Western cultures in general [2,3]. In particular, tobacco smoking and alcohol consumption are serious problems not only for adolescent but also for adulthood health considering that juvenile behavioural pattern such as smoking will presumably establish itself in adulthood, since the majority of adult smokers report having started at an early age [4-6]. Especially adolescents aged between 12 and 14 years represent the high risk group for an onset of alcohol consumption and smoking initiation. Preventing juvenile substance use is therefore an important aim to avoid premature mortality and morbidity and to pave the way for a healthy lifestyle.

School-based prevention programs are considered to be one of the most appropriate and suitable strategies to tackle substance use [7-9]. Informational programs seem not as effective as those that focus on psychosocial strategies and educate adolescents about social norms and influences [10]. Another promising approach to promote a healthy lifestyle is the development and improvement of general life skills [11], skills for resisting social influence and substance-specific skills in adolescence [12]. General life skills empower adolescents in challenging situations, help to master life as competent as possible as well as to deal effectively with the realities of life, and help to prevent substance use and addiction. Enabling children to acquire knowledge and developing attitudes and life skills which support the adoption of healthy behaviours is an approach strongly recommended by the World Health Organization (WHO) [13]. For this reason, some primary prevention programs are based on the life skills approach even though the empirical evidence of the efficacy of these programs is rather weak [14]. Research on effective program components as well as on long-term effects have shown inconsistent results [7,15,16] and further research is needed.

## Aims and hypotheses

The focus of this study is to implement and evaluate a school-based curriculum for students in grade five and six, developed upon evidence-based criteria for effective drug prevention curricula in schools. The overall aim of this school-based curriculum is the prevention of substance use and addiction by increasing substance specific skills and general life skills of students in grade five and six. To evaluate effects as well as feasibility and practicability of the program, a four-wave controlled study is conducted in daily school routine.

“Eigenständig werden 5+6” (“Becoming independent 5+6”) is a universal school-based prevention program for grade five and six based on the social influence model and on the life skills approach. It contains substance-specific as well as substance-unspecific elements and takes quality criteria of effective prevention programs into account [8,17-19]. It is expected that participation in the prevention program will lead to lower rates of adolescent’s smoking initiation and to abstinence from alcohol or at least to a more responsible consumption. The program is designed to address both the social and psychological factors promoting the onset of tobacco smoking and drinking alcohol by attempting to increase the students' ability to cope with pressures to smoke and to drink and to decrease student’s susceptibility to pro-smoking and pro-alcohol social influences. It targets at the improvement of students’ refusal skills and their ability to cope with emotions, stress and problems. Overall, dependent variables to be influenced by the prevention program are use of tobacco and alcohol, smoking-related and alcohol-related knowledge, intentions and attitudes towards substance use, susceptibility to smoking cigarettes and alcohol and general life skills, social skills as well as substance-specific refusal skills.

## METHODS AND ANALYSIS

### Intervention

“Eigenständig werden 5+6” was designed by an interdisciplinary team of psychologists, sports scientists and pedagogues. The prevention program consists of twelve 45- to 90-

1  
2  
3 minute units. The units are evenly distributed over grades five and six and include the  
4  
5 following components: life skills (i.e. problem solving, critical thinking, effective  
6  
7 communication skills, decision-making, interpersonal relationship skills, self-awareness  
8  
9 building skills, empathy, coping with stress, and emotions), student's ability to work in a  
10  
11 group and substance specific skills. To facilitate the accomplishment of the prevention  
12  
13 program, an order of units was predetermined.  
14  
15

16  
17 In addition, alcohol and smoking are addressed in two workshops lasting four till six hours.  
18  
19 The workshops include several activities about substance use such as smoking cigarettes  
20  
21 and alcohol abuse, and will be carried out at the end of grade five and six. Profound  
22  
23 knowledge and skills will be conveyed in these workshops by providing different learning  
24  
25 stations for students. Students can choose in what order they do the stations but are required  
26  
27 to complete all of them. At the end of grade five, tobacco smoking is the general topic  
28  
29 whereas alcohol consumption will be addressed at the end of grade six.  
30  
31

32  
33 The entire prevention program is conducted by the teachers in classroom during usual  
34  
35 school lessons. Teachers receive a manual which provides specific instructions and  
36  
37 background information that is needed to conduct the units and they took part in a two day  
38  
39 training course that was carried out by especially qualified prevention experts. To develop life  
40  
41 skills, miscellaneous teaching methods, such as interactive didactics, working in small  
42  
43 groups, relaxation exercises, pantomime, identification figures, and active games are used.  
44  
45 Units as well as workshops include working sheets and several background information and  
46  
47 instructions.  
48  
49

50  
51 Additionally, the program involves parents by providing three parent-teacher conferences  
52  
53 and different informational material to keep them informed on their children's subjects. The  
54  
55 informational materials include suggestions and rules on how to support their children. To  
56  
57 take families with an immigration background into consideration, all parental information are  
58  
59 also available in Turkish and Russian.  
60



## Study Design

To evaluate effects of “Eigenständig werden 5+6”, a four-wave cluster randomised controlled trial with two arms, an intervention and a control condition, is conducted. The intervention group takes part in the prevention programme and will be compared with the non-treated, “usual curriculum” control group. The actual intervention duration is from the beginning in grade five (October/November 2010) till the end of grade six, spanning a period of two school years. The randomisation occurred at school level to avoid information exchange between the conditions in the schools. Data are collected prior to the start of the intervention (September/October 2010), at the end of grade five (June/July 2011), at the end of grade six (June/July 2012) and in the middle of grade seven (December 2012).

## Calculated sample size

The cluster randomised trial involves randomising social units or clusters of individuals rather than individuals themselves. Specific constraints must be considered during planning and analysis [20]. Indeed, the responses of individuals within a cluster tend to be more similar than those of individuals of different clusters. The clustering effect is defined as  $1 + (m - 1)\rho$ , where  $m$  is the average number of subjects per cluster and  $\rho$  the intraclass correlation coefficient (ICC) [21]. Values of ICC for smoking and drinking behaviour were taken from the EU Drug Addiction Prevention Trial [22], and were estimated with approximately 0.02, which is in line with other estimations [23].

Power calculations were run with a sample size calculator for cluster randomized trials [24]. Based on earlier experiences, a drop-out rate of 25% was hypothesized. Taking as current estimates, the lifetime smoking prevalence at the age between 12 and 17 years (at the time of the follow-up tests the age of most students will be approximately 13 till 14 years) was valued with 43% [25], whereas the lifetime prevalence of alcohol consumption at the age between 11 and 17 years was estimated with 64% [26].

1  
2  
3 Applying a significance level of  $\alpha=0.05$ , power=0.80, a 15% prevention effect, and an  
4  
5 average number of 20 students per class ( $m$ ), the power calculations resulted in a recom-  
6  
7 mended sample size of 158 classes and 3,160 students.  
8  
9

### 10 **Sample recruitment**

11  
12 Sample recruitment took place in four German federal states: Schleswig-Holstein, North-  
13  
14 Rhine-Westphalia, Hesse and Bremen. In order to achieve a balanced representation of  
15  
16 social strata, complete lists of all secondary schools (except schools with students for special  
17  
18 needs) of selected regions in Schleswig-Holstein, North-Rhine-Westphalia, and Hesse were  
19  
20 obtained from the Ministries of Education of each federal state. In Bremen, all secondary  
21  
22 schools were included. Invited school types range from *Gymnasium* which is defined as a  
23  
24 school for students who have high academic skills and aim for university-entrance diploma  
25  
26 after accomplishment, to *Realschule*, *Hauptschule* and *Regionalschule* that focus on  
27  
28 students with lower academic skills compared to *Gymnasium*. After attending elementary  
29  
30 school, *Gymnasium* requires 8 till 9 years of school whereas students of *Realschule*,  
31  
32 *Hauptschule* or *Regionalschule* need to attend school for 5 till 6 years. Other school types  
33  
34 included are *Gemeinschaftsschule* as well as *Gesamtschule* which offer all kind of degrees  
35  
36 and in which students with varying academic skills are taught together.  
37  
38  
39  
40

41 Invitation letters and information sheets explaining the aims of the study were sent to the  
42  
43 head teachers of 450 secondary schools in the study regions. Schools were invited to  
44  
45 participate in the trial with all classes in grade five and were sent a detailed memorandum of  
46  
47 understanding to sign and to obtain head teachers' written commitment to the trial. The  
48  
49 importance of the randomized design was emphasized and it was made clear to schools that  
50  
51 it would be preferable for them to decline participation rather than to join the study and  
52  
53 withdraw commitment at a later point. Schools agreeing to participate registered for the study  
54  
55 by indicating general interest and the number of fifth grade classes interested in the study,  
56  
57 the names of the class teachers and the number of students per class. In addition, schools  
58  
59 could ask for visits of the project staff to receive first hand information on the requirements of  
60  
the trial.

1  
2  
3 323 out of 450 schools invited did neither express approval nor disapproval, whereas 79  
4  
5 schools with approximately 180 fifth grade classes denied their participation mostly due to  
6  
7 shortage of time because of structural changes imposed by Ministries of Education. 48  
8  
9 schools (11%) with 191 classes and 4,772 students out of 450 schools invited decided to  
10  
11 take part in the study. The highest rate of participation was found for Hesse as 28% of all  
12  
13 schools invited decided to join the study. A lower rate can be stated for North-Rhine-  
14  
15 Westphalia (15%) and Bremen (14%) as well as for Schleswig-Holstein (8%) where only 18  
16  
17 out of 228 schools agreed to participate.  
18  
19

20  
21 Schools were stratified according to the following criteria: (1) study region, (2) type of school,  
22  
23 (3) number of fifth grade classes per school. According to these strata, schools were ran-  
24  
25 domly assigned to the two arms of the study with a 50 per cent chance of being allocated to  
26  
27 either group. Of these 48 schools agreeing to participate, 26 schools with 97 classes and  
28  
29 2,437 students were allocated to intervention group whereas 22 schools with 94 classes and  
30  
31 2,335 students were assigned to control condition. After randomisation, three schools of  
32  
33 intervention group withdrew their consent as well as four teachers of intervention classes  
34  
35 refused to take part. Taking absent students and those with no parental permission into  
36  
37 account, baseline data of 23 intervention schools with 81 classes and 1,685 students were  
38  
39 available.  
40  
41

42  
43 In control condition, teachers of three classes withdrew consent, 361 students had no  
44  
45 parental permission and 131 were absent at day of data collection. Therefore, baseline data  
46  
47 of 22 schools with 91 classes and 1,759 students were collected (see Figure 1).  
48  
49

50  
51 Thus, 45 schools and 172 classes take part in the study and data of 3,444 students were  
52  
53 assessed at baseline altogether. An overall of 592 students were not eligible because of  
54  
55 missing parental consent. Considering the recommended sample size, the sample of 172  
56  
57 classes with 3,444 students at baseline fits the results of the power analysis (158 classes  
58  
59 with 3,160 students needed).  
60

## Questionnaire

Data was collected through self-completed anonymous questionnaires by teachers and students at baseline, prior to the beginning of the intervention and will be assessed by the same method in further waves.

### Questionnaire (students)

The students' questionnaire was developed and designed, pretested and modified prior to the baseline assessment.

At the beginning of the development of the questionnaire, a focus group of students (N=7) was interviewed to gain insight into student's environment to detect, for example, typical situations that might be stressful or that cause problems for this age group. This information helped to develop a questionnaire that is appropriate for students in grades five and six.

Afterwards, a first version of the questionnaire was pretested in four fifth grade classes (N=95) and additionally in two classes (N=14) in schools for children with special needs to eliminate items hard to understand as well as items with poor psychometric quality.

The final questionnaire assesses outcomes such as use of tobacco and alcohol consumption in forms of current behaviour and lifetime prevalence, smoking-related and alcohol-related knowledge, intentions and attitudes towards substance use, susceptibility to smoking cigarettes and alcohol and general life skills, social skills and substance-specific refusal skills. Questions concerning substance use covered own lifetime smoking prevalence likewise alcohol consumption. Furthermore, frequency of current consumption, episodes of drunkenness and binge drinking were investigated. Knowledge, intentions and attitudes about smoking cigarettes and drinking alcohol, susceptibility along with smoking and alcohol related behaviour of peers and family were included. Confounders like socio-demographic characteristics, bullying, class climate and leisure time behaviour were also assessed at baseline, stable traits like characteristics of personality and general parenting style will be assessed at post-test, due to aspects of feasibility (especially length of questionnaire and time needed for completion).

In general, items included in the questionnaire are based on “standard” questions used in the international literature, in published questionnaires or in own previous research. Table 1 summarizes all variables including references.

Table 1. Overview of variable constructs.

| General life skills   | Substance use (Smoking and alcohol)                      | Additional/Confounders                 |
|-----------------------|----------------------------------------------------------|----------------------------------------|
| Communication [27,28] | Smoking-related and alcohol-related knowledge            | Socio demographic characteristics [29] |
| Self esteem [30]      | Use of tobacco [31,32]                                   | General parenting style* [33]          |
| Self-efficacy [28]    | Use of alcohol [35]                                      | Personality characteristics* [36,37]   |
| Self concept [27]     | Intentions and attitudes and normative expectations [38] | Leisure time behaviour [34]            |
| Empathy [39]          | Susceptibility [40]                                      | Class climate**                        |
| Emotions [41]         | Resistance skills [42]                                   | Bullying [43,44]                       |
| Stress [45]           | Social influence [32,46]                                 |                                        |
| Problem solving [27]  | Perceived parental rules and attitudes [47,48]           |                                        |

\* Assessed at first post-test. \*\* On the basis of own previous research.

Specific values for the life skills-scales, for intentions, attitudes and perceived risks at baseline along with representative items and used response scales are displayed in table 2. If item-total correlation, difficulty or Cronbach’s Alpha exceed limiting values, scales were modified for data analysis by excluding items in order to increase psychometric quality. All values shown in table 2 represent final scales. Stress, problem-solving, and handling emotions will be interpreted on single item level in order to ascertain student’s strategies to handle situations and to cluster specific types.

Table 2. Internal consistency at baseline.

| Scales<br>(Item exemplification)                                                                                                                                         | Cronbach's<br>$\alpha$ | Number<br>of Items | Item-total<br>Correlation<br>$r_{it}$ | Item<br>Difficulty<br>$P_i$ in % |
|--------------------------------------------------------------------------------------------------------------------------------------------------------------------------|------------------------|--------------------|---------------------------------------|----------------------------------|
| Communication<br>( <i>"If I talk to somebody, I will not interrupt him/her"</i> )<br>Response category: 4 point scale (I do not agree – I agree)                         | $\alpha = .73$         | 9                  | .35 - .48                             | 57 - 86                          |
| Self esteem<br>( <i>"I sometimes think that I'm no good"</i> )<br>Response category: 4 point scale (I do not agree – I agree)                                            | $\alpha = .70$         | 5                  | .25 - .60                             | 60 - 85                          |
| Self-efficacy<br>( <i>"Whatever happens, I will handle it"</i> )<br>Response category: 4 point scale (I do not agree – I agree)                                          | $\alpha = .61$         | 5                  | .26 - .41                             | 58 - 70                          |
| Self concept<br>( <i>"I'm aware of my strengths"</i> )<br>Response category: 4 point scale (I do not agree – I agree)                                                    | $\alpha = .67$         | 8                  | .27 - .42                             | 55 - 82                          |
| Class climate<br>( <i>"We help each other"</i> )<br>Response category: 4 point scale (I do not agree – I agree)                                                          | $\alpha = .73$         | 9                  | .35 - .48                             | 57 - 86                          |
| Bullying<br>( <i>"How often have you taken part in bullying (kicking, beating) another student?"</i> )<br>Response category: 5 point scale<br>(Never - Few times a week) | $\alpha = .71$         | 3                  | .51 - .57                             | 5 - 13                           |
| Victimization<br>( <i>"How often have you been bullied (kicking, beating) by another student?"</i> )<br>Response category: 5 point scale<br>(Never - Few times a week)   | $\alpha = .78$         | 3                  | .57 - .67                             | 14 - 22                          |
| Smoking-related perceived risks<br>( <i>"I will be sick"</i> )<br>Response category: 4 point scale (Surely not - Surely yes)                                             | $\alpha = .76$         | 6                  | .43 - .58                             | 60 - 78                          |
| Alcohol-related perceived risks<br>( <i>"I will be sick"</i> )<br>Response category: 4 point scale (Surely not - Surely yes)                                             | $\alpha = .79$         | 5                  | .53 - .61                             | 63 - 80                          |

### Questionnaire (teachers)

Teachers were asked to complete a questionnaire to assess class climate. They should evaluate working atmosphere including student's ability to work together, concentration, motivation, and pace of work, student's ability to solve problems, the corporate feeling of the class as well as the relationship between students and teachers by assigning marks from 1 (very good) up to 6 (very poor). Cronbach's Alpha of class climate scale is acceptable ( $\alpha=.86$ ,  $r_{it}\geq.41$ ).

### Process evaluation

Teachers of the intervention group will additionally evaluate the implementation of the intervention programme and feasibility of every unit they will conduct. They were instructed while attending the teacher training and received questionnaires to document the process of implementation of "Eigenständig werden 5+6". These questionnaires cover the following information: date and duration of implementation, number of students attending the class, whether each of the core activities was or was not implemented, and a final judgment of the unit. By leaving space for open commentaries, teachers were encouraged to report their opinion on the units and activities as well as for anything else they want to comment. Furthermore, they should appraise the units' age-appropriateness and contents, and students' participation in the units.

### Assessment procedure

The assessment was planned by asking schools about their preferred date and time for data collection at the beginning of grade five. Contemporaneously, teachers collected the parental permission of all students in class. In three regions, passive parental permission was used, i.e. parents had to refuse to take part in the study rather than to agree. In one region, an active permission was requested by the respective Ministry, i.e. parents had to agree in case they complied with participation. Teachers registered all names of students with no permission in a list which should be saved in the schools throughout the entire trial. All students with refusal are excluded from all assessments. To permit a linking of individual

1  
2  
3 information on subsequent surveys while assuring anonymity, each questionnaire is labelled  
4 with a seven-digit individual code generated by the student. This procedure has been tested  
5 and used in several studies and therefore been inspected and approved by ethics committee,  
6 data protection and Ministries of Education repeatedly [49].  
7  
8  
9

10  
11 Data assessment was conducted in the class room and lasted 45 minutes. Project staff was  
12 responsible for the distribution, help in completion and collection of the questionnaire.  
13  
14

15  
16 Teachers were not involved. At the end of the assessment, all questionnaires which were  
17 completely filled out were placed in an envelope and sealed in front of the class. Every  
18 student was therefore assured that neither teachers nor parents were able to see the  
19 completed questionnaire.  
20  
21  
22  
23  
24

25  
26 79% (2,719) of all students were able to complete the questionnaire in 45 minutes. Students,  
27 who were not able to complete the entire questionnaire in 45 minutes, received a prepaid  
28 envelope. While the completed pages were collected by the staff, the students marked their  
29 own individual code on the last page, completed the unfilled pages of the questionnaire and  
30 anonymously sent it back to the project team. 46 % (331) of the students sent the pages  
31 back. Taking the questionnaires of absent students as well as afterwards sent pages into  
32 account, an overall of 2,922 data sets is complete at baseline. 522 data sets contain missing  
33 values on at least one page. Absent students were given a questionnaire and instructions in  
34 a prepaid envelope. After completion, they sent it back to the project team. An overall of 180  
35 questionnaires were left in schools for absent students. 95 of these questionnaires (53%)  
36 were sent back completely filled out.  
37  
38  
39  
40  
41  
42  
43  
44  
45  
46  
47  
48  
49

### 50 **Baseline characteristics**

51  
52 A total number of 45 schools, 172 classes and 3,444 students with a mean age of 10.37  
53 years (SD=.59) and 47.9% girls from four federal states in Germany were assessed at  
54 baseline. Baseline data suggest that the initial conditions are favourable for testing  
55 programme efficacy, since distribution of baseline levels of the outcomes does not differ in  
56 intervention and control condition. Exceptions are higher self-efficacy ( $t_{(3438)}=2.34$ ,  $p=.02$ ,  
57  
58  
59  
60



1  
2  
3 d=.08) and empathy ( $t_{(3302)}=2.4$ ,  $p=.01$ ,  $d=.09$ ) reported for control students, whereas class  
4  
5 climate, rated by students, seems better in intervention condition ( $t_{(3037)}=2.01$ ,  $p=.05$ ,  $d=.07$ ),  
6  
7 but effect sizes state marginal differences. Different distribution between the intervention and  
8  
9 the control arm at baseline assessment was also found for school type with a higher  
10  
11 proportion of students of *Gymnasiums* in control condition ( $\chi^2_{(1)}=17.7$ ,  $p=.001$ ). Differences  
12  
13 between the intervention and control condition were neither found for age, gender,  
14  
15 immigration background nor socio-economic status. Likewise, no significant differences  
16  
17 between intervention and control condition were found for teacher's evaluation of class  
18  
19 climate.  
20  
21

22  
23 Table 3 shows the characteristics of the baseline survey for intervention and control condition  
24  
25 and displays test statistics of differences between the conditions. Since responses of  
26  
27 students within their classes tend to be more similar than those of students of other classes,  
28  
29 the intra-class correlation coefficients for substance use are displayed as well.  
30  
31  
32  
33  
34  
35  
36  
37  
38  
39  
40  
41  
42  
43  
44  
45  
46  
47  
48  
49  
50  
51  
52  
53  
54  
55  
56  
57  
58  
59  
60

Table 3. Characteristics at the baseline survey.

| Baseline characteristics                                | Group                  |             |                   |             | Difference |                                                                              |
|---------------------------------------------------------|------------------------|-------------|-------------------|-------------|------------|------------------------------------------------------------------------------|
|                                                         | Intervention (n=1,685) |             | Control (n=1,759) |             |            |                                                                              |
|                                                         | N/ M (SD)              | %           | N/ M (SD)         | %           |            |                                                                              |
| Gender                                                  | Boys                   | 866         | 51.5              | 926         | 52.8       | $X^2_{(1)}=0.51, p=.48$                                                      |
|                                                         | Girls                  | 816         | 48.5              | 831         | 47.3       |                                                                              |
| Age                                                     |                        | 10.38 (.60) |                   | 10.35 (.58) |            | $t_{(3433)}=1.27, p=.21$                                                     |
| School type                                             | Gymnasium              | 620         | 36.8              | 771         | 43.7       | $X^2_{(1)}=17.7, p=.001$                                                     |
|                                                         | Others                 | 1,065       | 63.2              | 988         | 56.3       |                                                                              |
| Socio-economic status*                                  | Yes                    | 372         | 22.3              | 409         | 23.3       | $t_{(3439)}=0.01, p=.99$                                                     |
|                                                         | None                   | 1,575       | 94.4              | 1,629       | 93.6       |                                                                              |
| Lifetime smoking                                        | Only a few puffs       | 51          | 3.1               | 63          | 3.6        | $X^2_{(4)}=2.6, p=.63$<br>ICC <sub>Cl</sub> =.02<br>ICC <sub>Sch</sub> =.03  |
|                                                         | 1 -19 cigarettes       | 37          | 2.2               | 40          | 2.3        |                                                                              |
|                                                         | 20-100 cigarettes      | 5           | .30               | 5           | .29        |                                                                              |
|                                                         | > 100 cigarettes       | 1           | .06               | 4           | .23        |                                                                              |
| Current smoking                                         | No                     | 1,657       | 98.8              | 1,724       | 98.6       | $X^2_{(4)}=1.5, p=.83$<br>ICC <sub>Cl</sub> =.01<br>ICC <sub>Sch</sub> =.01  |
|                                                         | Yes                    | 21          | 1.2               | 25          | 1.4        |                                                                              |
| Lifetime alcohol consumption                            | No                     | 1,089       | 65.3              | 1,107       | 63.6       | $X^2_{(2)}=1.8, p=.40$<br>ICC <sub>Cl</sub> =.05<br>ICC <sub>Sch</sub> =.02  |
|                                                         | Yes                    | 576         | 34.5              | 631         | 36.3       |                                                                              |
| Lifetime alcohol consumption without parent's knowledge | No                     | 1,603       | 96.0              | 1,673       | 96.1       | $X^2_{(1)}=1.02, p=.60$<br>ICC <sub>Cl</sub> =.09<br>ICC <sub>Sch</sub> =.02 |
|                                                         | Yes                    | 64          | 4.0               | 67          | 3.9        |                                                                              |
| Current alcohol consumption ("in the last 30 days")     | Never                  | 1,572       | 94.1              | 1,642       | 94.4       | $X^2_{(2)}=1.6, p=.44$<br>ICC <sub>Cl</sub> =.01<br>ICC <sub>Sch</sub> =.004 |
|                                                         | On 1-2 days a month    | 85          | 5.1               | 77          | 4.4        |                                                                              |
|                                                         | ≥3 days a month        | 14          | 0.8               | 20          | 1.2        |                                                                              |

\*Socio-economic status was measured by Family Affluence Scale [29]; sum of two items: (range from 0 up to 3, a higher mean represents a higher socio-economic status). Abbreviation: Cl=classes, Sch=scho

## Statistical analysis

To test efficacy of the programme and to give consideration to cluster effects, state of the art analyses in this field including multilevel modelling will be carried out. In order to test effective programme components mediation analysis will be performed.

In a first step, it can be analysed if the lessons of prevention programme have affected what they ought to affect: Students of the intervention group should have higher substance-specific competencies and also higher substance-unspecific skills. In a second step, it can be analysed if a given change in substance use (=dependent variable) in the intervention group is mediated by (1) the substance-specific skills, (2) the substance-unspecific skills, (3) by both, or (4) by neither nor.

## ETHICS AND DISSEMINATION

Prior to the evaluation, the trial was approved and registered by the ethics committee of the Medical Faculty of the University of Kiel (AZ D 419/10) and approved by Ministries of Education. Parents were fully informed about the trial and its aim. Depending on the federal state, parental consent had to be given either in form of an active agreement or in form of a passive agreement. Students with no parental consent are excluded from all assessments. Anonymity is assured by using a seven-digit individual code that is generated by each student. The assessments are optional and each student can deny completing the questionnaire without any explanation.

## CONCLUSION

The aim of the “Eigenständig werden 5+6” trial is to evaluate the efficacy of a school-based prevention program for substance use. It involves more than 3,000 students from four federal states of Germany.

1  
2  
3 During the recruitment of the study population, only 28% of all invited schools reported if they  
4 want to join the study or not. A three-fold rate did not give a feedback at all. The most likely  
5 explanation for this low feedback rate is that schools are busy with class organization prior to  
6 the beginning of the school year. Beyond that, structural changes imposed by the Ministries  
7 of Education at time of recruitment come to the fore in terms of combining schools and  
8 restructuring school types which complicated the situations for schools. Nevertheless, the  
9 calculated sample size was accomplished.

10  
11 After randomisation three classes from control group and 16 classes from intervention group  
12 withdrew the consent to participate. Since all of these classes did so after the randomization,  
13 it is assumed that schools and teachers probably underestimated the effort and commitment  
14 for participating in the study. Unfortunately, two schools of intervention condition that  
15 dropped out were *Gymnasiums*. Therefore, a difficulty that might bias outcome effects is the  
16 higher proportion of students who attend schools with higher academic requirements in  
17 control condition. But distribution represents conservative bias due to assumptions that  
18 socioeconomic status as well as a higher education level mediates substance use. Initial  
19 conditions seem therefore to be favourable since no baseline difference between conditions  
20 were reported, except school type and marginal difference between self-efficacy, empathy  
21 and class climate.

22  
23 The use of self-completed questionnaires could be a limitation to this study. Indeed, the risk  
24 of over or under reporting from students or the tendency to project favourable images of  
25 oneself (social desirability) are major problems in studies using self-reports. Due to  
26 randomization, these potential limiting factors should be evenly distributed over both  
27 conditions. Nonetheless, use of self-report is an inevitable procedure when including a large  
28 number of participants. Furthermore, general set-ups in this study like anonymisation of  
29 information [50], non-involvement of teachers and parents while data assessment might  
30 reduce limitation factors.

31  
32 It is hypothesised that the intervention will lead to an increase of general life skills, refusal  
33 skills, and knowledge about substance use. These enhancements should be accompanied

1  
2  
3 by a lower likelihood of smoking onset and alcohol consumption. By evaluating process,  
4  
5 aspects of acceptance, feasibility, and practicability of the programme as well as of fidelity of  
6  
7 the implementation will be considered. Teachers' feedbacks can be used for improving  
8  
9 materials if necessary. Should we be able to confirm the hypotheses, an effective  
10  
11 programme can be implemented in several schools in order to prevent adolescent substance  
12  
13 use.  
14  
15  
16  
17  
18  
19  
20  
21  
22  
23  
24  
25  
26  
27  
28  
29  
30  
31  
32  
33  
34  
35  
36  
37  
38  
39  
40  
41  
42  
43  
44  
45  
46  
47  
48  
49  
50  
51  
52  
53  
54  
55  
56  
57  
58  
59  
60

For peer review only

## Reference List

1. Bundeszentrale für gesundheitliche Aufklärung: *Der Tabakkonsum Jugendlicher und junger Erwachsener in Deutschland 2010. Ergebnisse einer aktuellen Repräsentativbefragung und Trends*. Köln: Bundeszentrale für gesundheitliche Aufklärung; 2011.
2. Eaton DK, Kann L, Kinchen S, Ross J, Hawkins J, Harris WA *et al.*: **Youth risk behavior surveillance--United States, 2005**. *MMWR Surveill Summ* 2006, **55**: 1-108.
3. Warren CW, Jones NR, Eriksen MP, Asma S: **Patterns of global tobacco use in young people and implications for future chronic disease burden in adults**. *Lancet* 2006, **367**: 749-753.
4. Chassin L, Presson CC, Sherman SJ, Edwards DA: **The natural history of cigarette smoking: predicting young-adult smoking outcomes from adolescent smoking patterns**. *Health Psychol* 1990, **9**: 701-716.
5. Gilman SE, Rende R, Boergers J, Abrams DB, Buka SL, Clark MA *et al.*: **Parental smoking and adolescent smoking initiation: an intergenerational perspective on tobacco control**. *Pediatrics* 2009, **123**: e274-e281.
6. MacKinnon DP, Taborga MP, Morgan-Lopez AA: **Mediation designs for tobacco prevention research**. *Drug Alcohol Depend* 2002, **68 Suppl 1**: S69-S83.
7. Faggiano F, Vigna-Taglianti FD, Versino E, Zambon A, Borraccino A, Lemma P: **School-based prevention for illicit drugs' use**. *Cochrane Database Syst Rev* 2005, CD003020.
8. Gottfredson DC, Wilson DB: **Characteristics of effective school-based substance abuse prevention**. *Prev Sci* 2003, **4**: 27-38.
9. Flay BR: **Approaches to substance use prevention utilizing school curriculum plus social environment change**. *Addict Behav* 2000, **25**: 861-885.

- 1  
2  
3 10. Flay BR: **School-based smoking prevention programs with the promise of long-**  
4 **term effects.** *Tob Induced Dis* 2009, **5**: 6.  
5  
6
- 7  
8 11. Foxcroft DR, Tsertsvadze A: **Universal school-based prevention programs for**  
9 **alcohol misuse in young people.** *Cochrane Database Syst Rev* 2011, **5**: CD009113.  
10  
11
- 12 12. Flay BR: **The promise of long-term effectiveness of school-based smoking**  
13 **prevention programs: a critical review of reviews.** *Tob Induced Dis* 2009, **5**: 7.  
14  
15
- 16 13. WHO: *Life skills education in schools, parts 1 and 2.* Geneva: WHO, Division of Mental  
17 Health; 1994.  
18  
19
- 20 14. Gorman DM: **The "science" of drug and alcohol prevention: the case of the**  
21 **randomized trial of the Life Skills Training program.** *Int J Drug Policy* 2002, **13**: 21-  
22 26.  
23  
24
- 25 15. Peterson AVJr, Kealey KA, Mann SL, Marek PM, Sarason IG: **Hutchinson Smoking**  
26 **Prevention Project: long-term randomized trial in school-based tobacco use**  
27 **prevention--results on smoking.** *J Natl Cancer Inst* 2000, **92**: 1979-1991.  
28  
29
- 30 16. Wiehe SE, Garrison MM, Christakis DA, Ebel BE, Rivara FP: **A systematic review of**  
31 **school-based smoking prevention trials with long-term follow-up.** *J Adolesc*  
32 *Health* 2005, **36**: 162-169.  
33  
34
- 35 17. Cuijpers P: **Effective ingredients of school-based drug prevention programs. A**  
36 **systematic review.** *Addict Behav* 2002, **27**: 1009-1023.  
37  
38
- 39 18. Cuijpers P: **Three decades of drug prevention research.** *Drug Educ Prev Polic* 2003,  
40 **10**: 7-20.  
41  
42
- 43 19. Hansen WB, Dusenbury L, Bishop D, Derzon JH: **Substance abuse prevention**  
44 **program content: systematizing the classification of what programs target for**  
45 **change.** *Health Educ Res* 2007, **22**: 351-360.  
46  
47
- 48 20. Campbell MJ, Donner A, Klar N: **Developments in cluster randomized trials and**  
49 **Statistics in Medicine.** *Stat Med* 2007, **26**: 2-19.  
50  
51  
52  
53  
54  
55  
56  
57  
58  
59  
60

- 1  
2  
3 21. Murray DM, Varnell SP, Blitstein JL: **Design and analysis of group-randomized**  
4 **trials: a review of recent methodological developments.** *Am J Public Health* 2004,  
5 **94:** 423-432.  
6  
7  
8  
9  
10 22. Faggiano F, Richardson C, Bohrn K, Galanti MR: **A cluster randomized controlled**  
11 **trial of school-based prevention of tobacco, alcohol and drug use: the EU-Dap**  
12 **design and study population.** *Prev Med* 2007, **44:** 170-173.  
13  
14  
15  
16  
17 23. Murray DM, Hannan PJ: **Planning for the appropriate analysis in school-based**  
18 **drug-use prevention studies.** *J Consult Clin Psychol* 1990, **58:** 458-468.  
19  
20  
21  
22 24. Campbell MK, Thomson S, Ramsay CR, MacLennan GS, Grimshaw JM: **Sample size**  
23 **calculator for cluster randomized trials.** *Comput Biol Med* 2004, **34:** 113-125.  
24  
25  
26  
27 25. Bundeszentrale für gesundheitliche Aufklärung: *Förderung des Nichtrauchens bei*  
28 *Jugendlichen 2007. Eine Repräsentativbefragung der Bundeszentrale für*  
29 *gesundheitliche Aufklärung.* Köln: BZgA; 2007.  
30  
31  
32  
33  
34 26. Lampert T, Thamm M: **Tabak-, Alkohol- und Drogenkonsum von Jugendlichen in**  
35 **Deutschland. Ergebnisse des Kinder und Jugendgesundheitsveys (KiGGS).**  
36 *Bundesgesundheitsblatt Gesundheitsforschung Gesundheitsschutz* 2007, **50:** 600-608.  
37  
38  
39  
40  
41 27. Bühler A, Schröder E, Silbereisen RK: **The role of life skills promotion in substance**  
42 **abuse prevention: a mediation analysis.** *Health Educ Res* 2007, **Epub ahead of**  
43 **print.**  
44  
45  
46  
47  
48 28. Jerusalem M, Drössler S, Kleine D, Klein-Heßling J, Mittag W, Röder B: *Skalen zur*  
49 *Erfassung von Lehrer- und Schülermerkmalen. Förderung von Selbstwirksamkeit und*  
50 *Selbstbestimmung im Unterricht.* Berlin: Humboldt-Universität zu Berlin Lehrstuhl für  
51 *Pädagogische Psychologie und Gesundheitspsychologie;* 2009.  
52  
53  
54  
55  
56  
57  
58  
59  
60



- 1  
2  
3 29. Currie C, Molcho M, Boyce W, Holstein B, Torsheim T, Richter M: **Researching health**  
4 **inequalities in adolescents: the development of the Health Behaviour in School-**  
5 **Aged Children (HBSC) family affluence scale.** *Soc Sci Med* 2008, **66**: 1429-1436.  
6  
7  
8  
9  
10 30. Collani von G, Herzberg PY: **Eine revidierte Fassung der deutschsprachigen Skala**  
11 **zum Selbstwertgefühl von Rosenberg.** *Zeitschrift für Differentielle und Diagnostische*  
12 *Psychologie* 2003, **24**: 3-7.  
13  
14  
15  
16  
17 31. World Health Organisation: *Guidelines for controlling and monitoring the tobacco*  
18 *epidemic.* Geneva: World Health Organisation; 1998.  
19  
20  
21  
22 32. Biglan A, Severson H, Ary D, Faller C, Gallison C, Thompson R *et al.*: **Do smoking**  
23 **prevention programs really work? Attrition and the internal and external validity**  
24 **of an evaluation of a refusal skills training program.** *J Behav Med* 1987, **10**: 159-  
25 171.  
26  
27  
28  
29  
30  
31 33. Jackson C, Henriksen L, Foshee VA: **The Authoritative Parenting Index: predicting**  
32 **health risk behaviors among children and adolescents.** *Health Educ Behav* 1998,  
33 **25**: 319-337.  
34  
35  
36  
37  
38 34. Prochaska JJ, Sallis JF, Long B: **A physical activity screening measure for use with**  
39 **adolescents in primary care.** *Arch Pediatr Adolesc Med* 2001, **155**: 554-559.  
40  
41  
42  
43 35. Kraus L, Pabst A, Steiner S. *Europäische Schülerstudie zu Alkohol und anderen*  
44 *Drogen 2007 (ESPAD). Befragung von Schülerinnen und Schülern der 9. und 10.*  
45 *Klasse in Bayern, Berlin, Brandenburg, Hessen, Mecklenburg-Vorpommern, Saarland*  
46 *und Thüringen.* Edited by Bundesministerium für Gesundheit. 2008. Institut für  
47 Therapie, IFT München. IFT-Berichte Bd. 165.  
48  
49  
50  
51  
52  
53  
54 36. Stephenson MT, Hoyle RH, Palmgreen P, Slater MD: **Brief measures of sensation**  
55 **seeking for screening and large-scale surveys.** *Drug Alcohol Depend* 2003, **72**:  
56 279-286.  
57  
58  
59  
60

- 1  
2  
3 37. Burt RD, Dinh KT, Peterson AV, Jr., Sarason IG: **Predicting adolescent smoking: a**  
4 **prospective study of personality variables.** *Prev Med* 2000, **30**: 115-125.  
5  
6  
7  
8 38. Schneider S, Janßen M, Röhrig S, Schüssler M, Solle D: **"Warum nicht?" -**  
9 **Inhaltsanalyse der Motivangaben zum Rauchverzicht von über 700 Schülern:**  
10 **SToP-Studie 2008.** *Dtsch Med Wochenschr* 2009, **134**: 1573-1577.  
11  
12  
13  
14  
15 39. Lukesch H: *Fragebogen zur Erfassung von Empathie, Prosozialität,*  
16 *Aggressionsbereitschaft und aggressivem Verhalten : FEPA.* Göttingen [u.a.]:  
17 Hogrefe; 2006.  
18  
19  
20  
21  
22 40. Pierce JP, Choi WS, Gilpin EA, Merritt RK, Farkas AJ: **Validation of susceptibility as**  
23 **a predictor of which adolescents take up smoking in the United States.** *Health*  
24 *Psychol* 1996, **15**: 355-361.  
25  
26  
27  
28  
29 41. Grob A, Smolenski C: *Fragebogen zur Erhebung der Emotionsregulation bei Kindern*  
30 *und Jugendlichen : FEEL-KJ.* Bern [u.a.]: Huber; 2005.  
31  
32  
33  
34 42. Epstein JA, Botvin GJ: **Media resistance skills and drug skill refusal techniques:**  
35 **What is their relationship with alcohol use among inner-city adolescents?** *Addict*  
36 *Behav* 2008, **33**: 528-537.  
37  
38  
39  
40  
41 43. Olweus D: **Bully/victim problems among schoolchildren: basic facts and effects**  
42 **of a school-based intervention program.** In *The development and treatment of*  
43 *childhood aggression.* Edited by Pepler DJ, Rubnin KH. Hillsday, New Jersey:  
44 Lawrence Erlbaum Associates; 1991:411-448.  
45  
46  
47  
48  
49  
50 44. Solberg ME, Olweus D: **Prevalence Estimation of School Bullying With the Olweus**  
51 **Bully/Victim Questionnaire.** *Aggress Behav* 2003, **29**: 239-268.  
52  
53  
54  
55 45. Hampel P, Petermann F, Dickow B: *SVF-KJ: Stressverarbeitungsfragebogen von*  
56 *Janke und Erdmann, angepasst für Kinder und Jugendliche.* Göttingen [u.a.]: Hogrefe;  
57 2001.  
58  
59  
60

- 1  
2  
3  
4  
5  
6  
7  
8  
9  
10  
11  
12  
13  
14  
15  
16  
17  
18  
19  
20  
21  
22  
23  
24  
25  
26  
27  
28  
29  
30  
31  
32  
33  
34  
35  
36  
37  
38  
39  
40  
41  
42  
43  
44  
45  
46  
47  
48  
49  
50  
51  
52  
53  
54  
55  
56  
57  
58  
59  
60
46. Donaldson SI, Graham JW, Piccinin AM, Hansen WB: **Resistance-skills training and onset of alcohol use: evidence for beneficial and potentially harmful effects in public schools and in private Catholic schools.** *Health Psychol* 1995, **14**: 291-300.
47. Raschke P, Kalke J: **Haben Eltern Einfluss auf das Rauchverhalten ihrer Kinder?** *Prävention* 2005, **28**: 18-21.
48. van der Vorst H, Engels RC, Meeus W, Dekovic M, van Leeuwe J: **The role of alcohol-specific socialization in adolescents' drinking behaviour.** *Addiction* 2005, **100**: 1464-1476.
49. Galanti MR, Siliquini R, Cuomo L, Melero JC, Panella M, Faggiano F: **Testing anonymous link procedures for follow-up of adolescents in a school-based trial: The EU-DAP pilot study.** *Prev Med* 2007, **44**: 174-177.
50. Velicer WF, Prochaska JO, Rossi JS, Snow MG: **Assessing outcome in smoking cessation studies.** *Psychol Bull* 1992, **111**: 23-41.

### List of abbreviations

ICC: Intra-class coefficient, WHO: World Health Organization, Cl: Classes, Sch: School

### Authors' contributions

JH drafted the manuscript, participated in acquisition of data, and performed statistical analysis and interpretation of data.

RH contributed to study concept and design, study supervision and critical revision of the manuscript for important intellectual content.

KM participated in acquisition of data, and statistical analysis.

BI contributed to study concept and design, study supervision and critical revision of the manuscript for important intellectual content, participated in drafting the manuscript, acquisition of data and its analysis and interpretation.

All authors read and approved the final manuscript.

### Funding statement

The „Eigenständig werden“ prevention trial is funded by German Cancer Aid as one of five projects in the Priority Program Primary Prevention of Cancer (Substance use) (No 108374).

After a positive decision on applying for study support, the German Cancer Aid did not influence the collection, analysis or interpretation of data or the writing of the article and decision to submit it.

### Competing interests

IFT-Nord is responsible both for development and evaluation of the programme “Eigenständig werden”.

### Copyright

The Corresponding Author has the right to grant on behalf of all authors and does grant on behalf of all authors, an exclusive licence (or non-exclusive for government employees) on a worldwide basis to the BMJ Group and co-owners or contracting owning societies (where

1  
2  
3 published by the BMJ Group on their behalf), and its Licensees to permit this article (if  
4  
5 accepted) to be published in BMJ Open and any other BMJ Group products and to exploit all  
6  
7 subsidiary rights, as set out in our licence.  
8  
9

### 10 **Acknowledgements**

11  
12 We would like to thank our partners: Institut für Qualitätsentwicklung an Schulen Schleswig-  
13  
14 Holstein, Landesinstitut für Schule Bremen, Krisenhilfe Bochum, Fachstelle für  
15  
16 Suchtprävention im Wetteraukreis, Fachstelle für Suchtprävention des Zweckverbandes der  
17  
18 Diakonie Bad Hersfeld, Diakonie Herford, Koordinationsstelle Schulische Suchtvorbeugung,  
19  
20 Fachstelle für Suchtvorbeugung Dortmund, Hessische Landesstelle für Suchtfragen, Ginko  
21  
22 Stiftung für Prävention, and all schools that participate in the study.  
23  
24  
25  
26  
27  
28  
29  
30  
31  
32  
33  
34  
35  
36  
37  
38  
39  
40  
41  
42  
43  
44  
45  
46  
47  
48  
49  
50  
51  
52  
53  
54  
55  
56  
57  
58  
59  
60

1  
2  
3  
4  
5  
6  
7  
8  
9  
10  
11  
12  
13  
14  
15  
16  
17  
18  
19  
20  
21  
22  
23  
24  
25  
26  
27  
28  
29  
30  
31  
32  
33  
34  
35  
36  
37  
38  
39  
40  
41  
42  
43  
44  
45  
46  
47  
48  
49  
50  
51  
52  
53  
54  
55  
56  
57  
58  
59  
60

**Figure legends**

Figure 1. Flowchart.

For peer review only

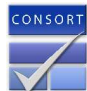

# CONSORT 2010 checklist of information to include when reporting a randomised trial\*

| Section/Topic                    | Item No | Checklist item                                                                                                                                                                              | Reported on page No |
|----------------------------------|---------|---------------------------------------------------------------------------------------------------------------------------------------------------------------------------------------------|---------------------|
| <b>Title and abstract</b>        |         |                                                                                                                                                                                             |                     |
|                                  | 1a      | Identification as a randomised trial in the title                                                                                                                                           | 1                   |
|                                  | 1b      | Structured summary of trial design, methods, results, and conclusions (for specific guidance see CONSORT for abstracts)                                                                     | 2-3                 |
| <b>Introduction</b>              |         |                                                                                                                                                                                             |                     |
| Background and objectives        | 2a      | Scientific background and explanation of rationale                                                                                                                                          | 5                   |
|                                  | 2b      | Specific objectives or hypotheses                                                                                                                                                           | 6                   |
| <b>Methods</b>                   |         |                                                                                                                                                                                             |                     |
| Trial design                     | 3a      | Description of trial design (such as parallel, factorial) including allocation ratio                                                                                                        | 8                   |
|                                  | 3b      | Important changes to methods after trial commencement (such as eligibility criteria), with reasons                                                                                          | n.a.                |
| Participants                     | 4a      | Eligibility criteria for participants                                                                                                                                                       | 9                   |
|                                  | 4b      | Settings and locations where the data were collected                                                                                                                                        | 14-15               |
| Interventions                    | 5       | The interventions for each group with sufficient details to allow replication, including how and when they were actually administered                                                       | 6-7                 |
| Outcomes                         | 6a      | Completely defined pre-specified primary and secondary outcome measures, including how and when they were assessed                                                                          | 11-14               |
|                                  | 6b      | Any changes to trial outcomes after the trial commenced, with reasons                                                                                                                       | n.a.                |
| Sample size                      | 7a      | How sample size was determined                                                                                                                                                              | 8                   |
|                                  | 7b      | When applicable, explanation of any interim analyses and stopping guidelines                                                                                                                | n.a.                |
| <b>Randomisation:</b>            |         |                                                                                                                                                                                             |                     |
| Sequence generation              | 8a      | Method used to generate the random allocation sequence                                                                                                                                      | 10                  |
|                                  | 8b      | Type of randomisation; details of any restriction (such as blocking and block size)                                                                                                         | 10                  |
| Allocation concealment mechanism | 9       | Mechanism used to implement the random allocation sequence (such as sequentially numbered containers), describing any steps taken to conceal the sequence until interventions were assigned | 10                  |
| Implementation                   | 10      | Who generated the random allocation sequence, who enrolled participants, and who assigned participants to interventions                                                                     | 10                  |
| Blinding                         | 11a     | If done, who was blinded after assignment to interventions (for example, participants, care providers, those                                                                                | n.a.                |

|    |                          |                                                                                                                     |       |
|----|--------------------------|---------------------------------------------------------------------------------------------------------------------|-------|
| 1  |                          | assessing outcomes) and how                                                                                         |       |
| 2  |                          | 11b If relevant, description of the similarity of interventions                                                     | n.a.  |
| 3  | Statistical methods      | 12a Statistical methods used to compare groups for primary and secondary outcomes                                   | 16    |
| 4  |                          | 12b Methods for additional analyses, such as subgroup analyses and adjusted analyses                                | 18    |
| 5  |                          |                                                                                                                     |       |
| 6  | <b>Results</b>           |                                                                                                                     |       |
| 7  | Participant flow (a      | 13a For each group, the numbers of participants who were randomly assigned, received intended treatment, and        | 10    |
| 8  | diagram is strongly      | were analysed for the primary outcome                                                                               |       |
| 9  | recommended)             | 13b For each group, losses and exclusions after randomisation, together with reasons                                | 10    |
| 10 | Recruitment              | 14a Dates defining the periods of recruitment and follow-up                                                         | 8     |
| 11 |                          | 14b Why the trial ended or was stopped                                                                              | n.a.  |
| 12 | Baseline data            | 15 A table showing baseline demographic and clinical characteristics for each group                                 | 17    |
| 13 | Numbers analysed         | 16 For each group, number of participants (denominator) included in each analysis and whether the analysis was      | n.a.  |
| 14 |                          | by original assigned groups                                                                                         |       |
| 15 | Outcomes and             | 17a For each primary and secondary outcome, results for each group, and the estimated effect size and its           | 16    |
| 16 | estimation               | precision (such as 95% confidence interval)                                                                         |       |
| 17 |                          | 17b For binary outcomes, presentation of both absolute and relative effect sizes is recommended                     | n.a.  |
| 18 | Ancillary analyses       | 18 Results of any other analyses performed, including subgroup analyses and adjusted analyses, distinguishing       | n.a.  |
| 19 |                          | pre-specified from exploratory                                                                                      |       |
| 20 | Harms                    | 19 All important harms or unintended effects in each group (for specific guidance see CONSORT for harms)            | n.a.  |
| 21 |                          |                                                                                                                     |       |
| 22 | <b>Discussion</b>        |                                                                                                                     |       |
| 23 | Limitations              | 20 Trial limitations, addressing sources of potential bias, imprecision, and, if relevant, multiplicity of analyses | 18-20 |
| 24 | Generalisability         | 21 Generalisability (external validity, applicability) of the trial findings                                        | n.a.  |
| 25 | Interpretation           | 22 Interpretation consistent with results, balancing benefits and harms, and considering other relevant evidence    | n.a.  |
| 26 |                          |                                                                                                                     |       |
| 27 | <b>Other information</b> |                                                                                                                     |       |
| 28 | Registration             | 23 Registration number and name of trial registry                                                                   | 3     |
| 29 | Protocol                 | 24 Where the full trial protocol can be accessed, if available                                                      | n.a.  |
| 30 | Funding                  | 25 Sources of funding and other support (such as supply of drugs), role of funders                                  | 27    |
| 31 |                          |                                                                                                                     |       |
| 32 |                          |                                                                                                                     |       |
| 33 |                          |                                                                                                                     |       |
| 34 |                          |                                                                                                                     |       |
| 35 |                          |                                                                                                                     |       |
| 36 |                          |                                                                                                                     |       |
| 37 |                          |                                                                                                                     |       |
| 38 |                          |                                                                                                                     |       |
| 39 |                          |                                                                                                                     |       |
| 40 |                          |                                                                                                                     |       |
| 41 |                          |                                                                                                                     |       |
| 42 |                          |                                                                                                                     |       |
| 43 |                          |                                                                                                                     |       |
| 44 |                          |                                                                                                                     |       |
| 45 |                          |                                                                                                                     |       |
| 46 |                          |                                                                                                                     |       |
| 47 |                          |                                                                                                                     |       |

\*We strongly recommend reading this statement in conjunction with the CONSORT 2010 Explanation and Elaboration for important clarifications on all the items. If relevant, we also recommend reading CONSORT extensions for cluster randomised trials, non-inferiority and equivalence trials, non-pharmacological treatments, herbal interventions, and pragmatic trials. Additional extensions are forthcoming: for those and for up to date references relevant to this checklist, see [www.consort-statement.org](http://www.consort-statement.org).



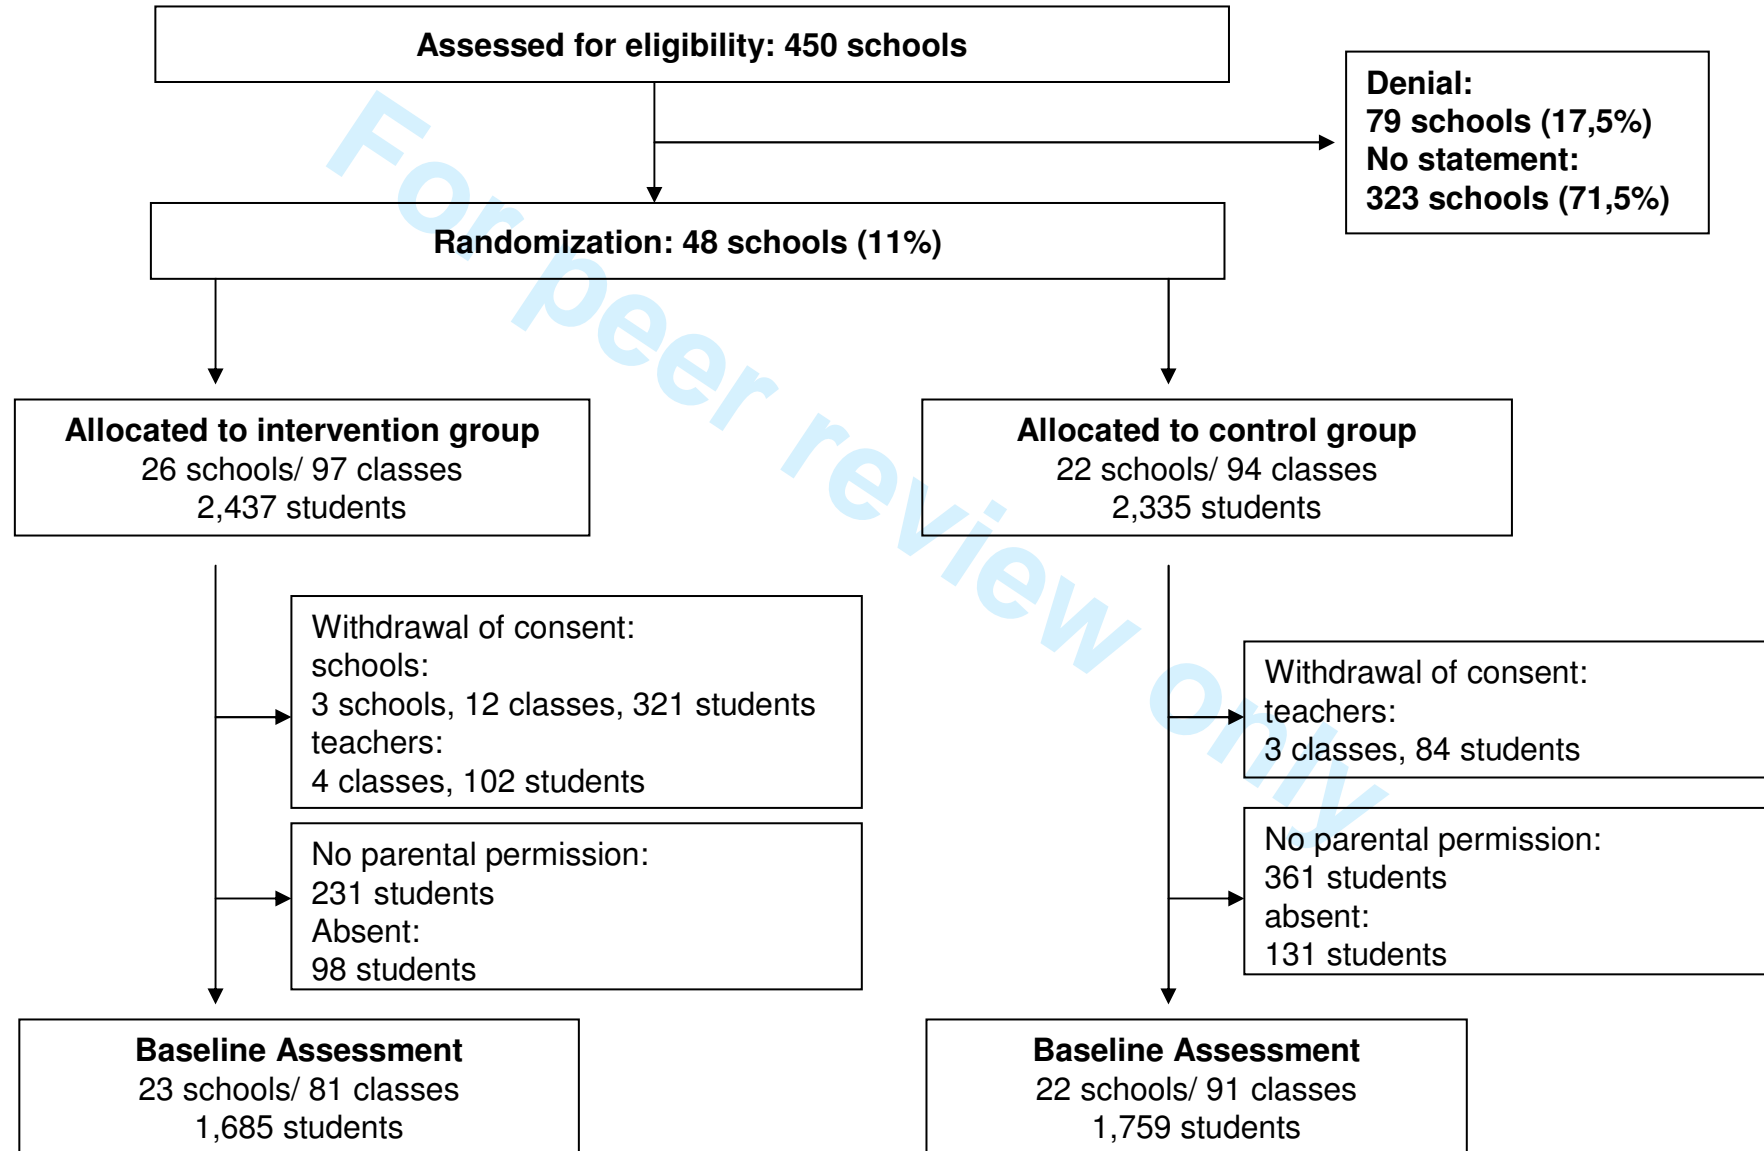

1  
2  
3  
4  
5  
6  
7  
8  
9  
10  
11  
12  
13  
14  
15  
16  
17  
18  
19  
20  
21  
22  
23  
24  
25  
26  
27  
28  
29  
30  
31  
32  
33  
34  
35  
36  
37  
38  
39  
40  
41  
42  
43  
44  
45  
46  
47

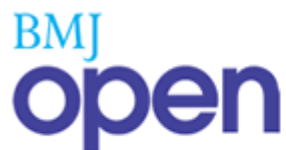

**The „Eigenständig werden“ prevention trial: a cluster randomised controlled study on a school-based life skills programme to prevent substance use onset.**

|                                 |                                                                                                                                                                                                                                                                                               |
|---------------------------------|-----------------------------------------------------------------------------------------------------------------------------------------------------------------------------------------------------------------------------------------------------------------------------------------------|
| Journal:                        | <i>BMJ Open</i>                                                                                                                                                                                                                                                                               |
| Manuscript ID:                  | bmjopen-2011-000352.R1                                                                                                                                                                                                                                                                        |
| Article Type:                   | Research                                                                                                                                                                                                                                                                                      |
| Date Submitted by the Author:   | 21-Sep-2011                                                                                                                                                                                                                                                                                   |
| Complete List of Authors:       | Hansen, Julia; Institute for Therapy and Health Research, IFT-Nord<br>Hanewinkel, Reiner; Institute for Therapy and Health Research, IFT-Nord<br>Maruska, Karin; Institute for Therapy and Health Research, IFT-Nord<br>Isensee, Barbara; Institute for Therapy and Health Research, IFT-Nord |
| <b>Primary Subject Heading</b>: | Public health                                                                                                                                                                                                                                                                                 |
| Keywords:                       | school-based prevention programme, general life skills, substance use                                                                                                                                                                                                                         |
|                                 |                                                                                                                                                                                                                                                                                               |

SCHOLARONE™  
Manuscripts

1  
2  
3  
4  
5  
6  
7  
8  
9  
10  
11  
12  
13  
14  
15  
16  
17  
18  
19  
20  
21  
22  
23  
24  
25  
26  
27  
28  
29  
30  
31  
32  
33  
34  
35  
36  
37  
38  
39  
40  
41  
42  
43  
44  
45  
46  
47

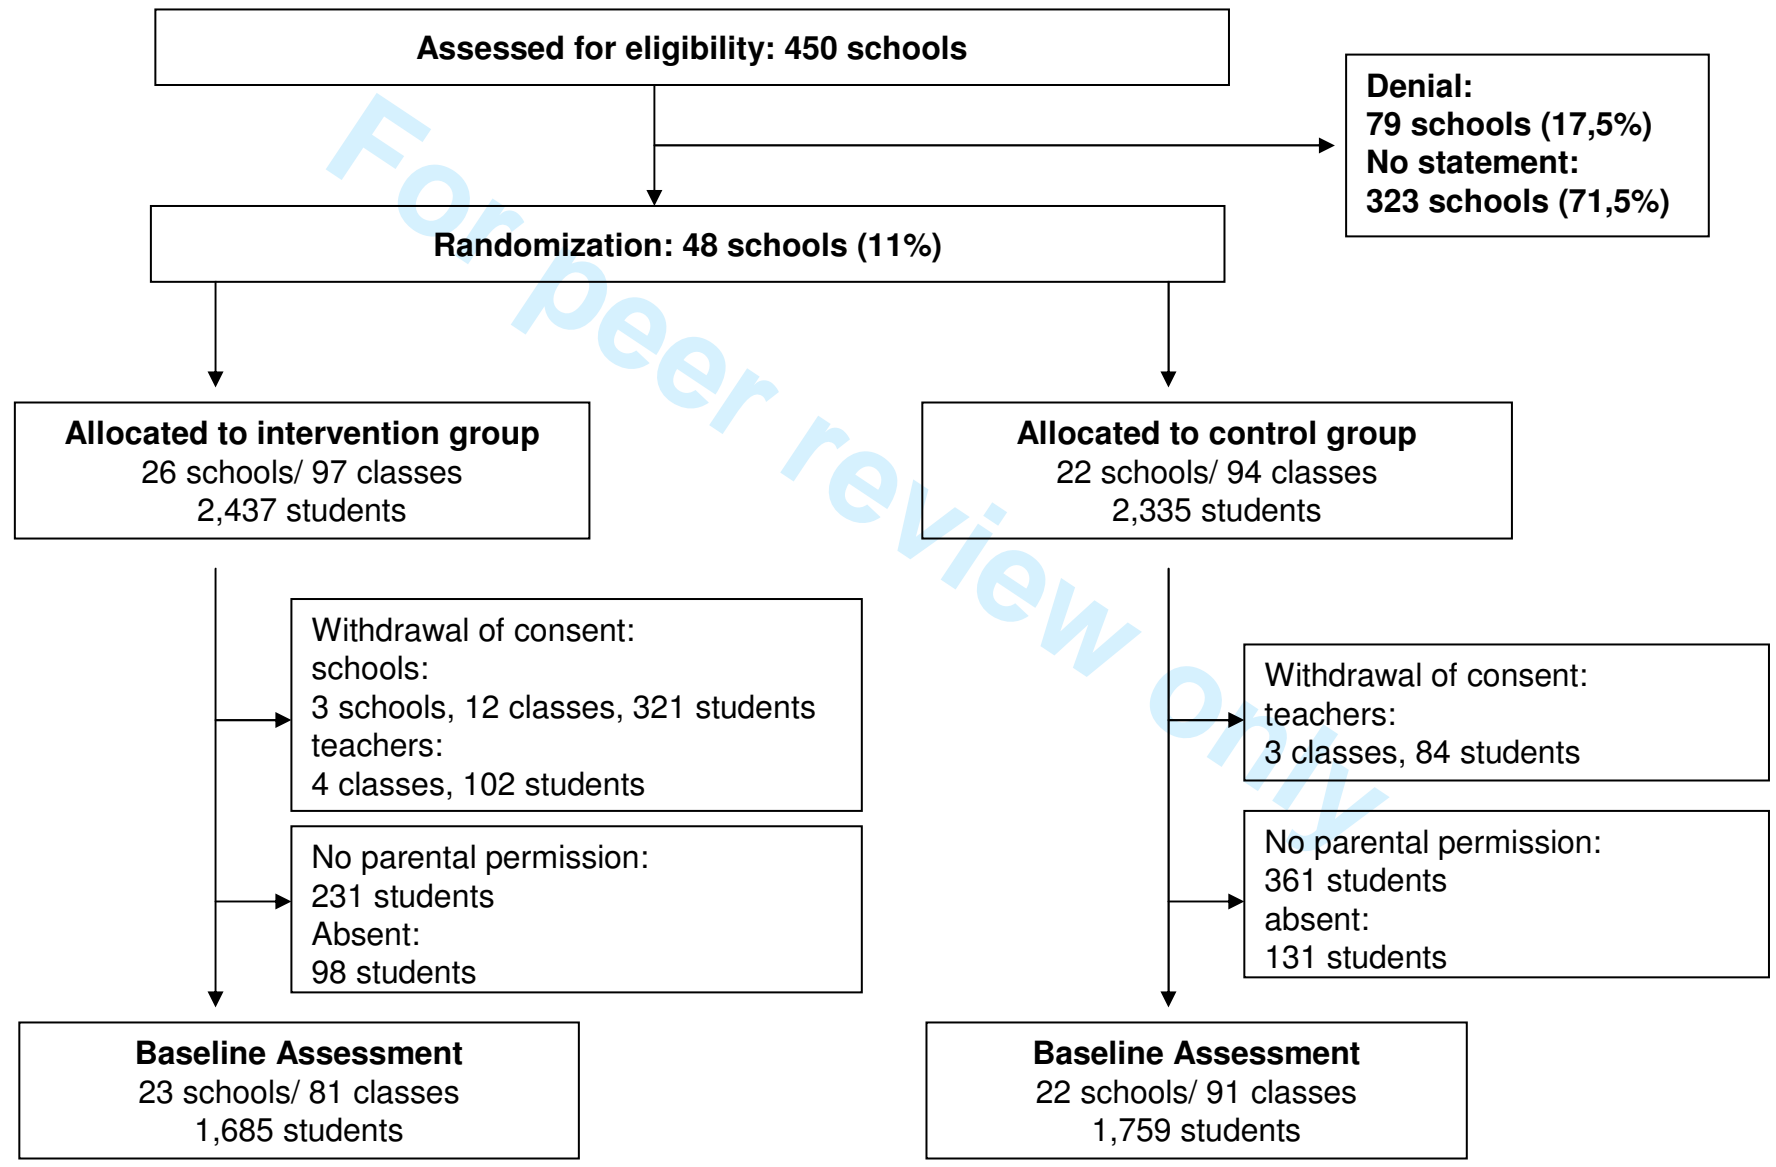

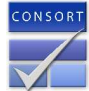

# CONSORT 2010 checklist of information to include when reporting a randomised trial\*

| Section/Topic                    | Item No | Checklist item                                                                                                                                                                              | Reported on page No |
|----------------------------------|---------|---------------------------------------------------------------------------------------------------------------------------------------------------------------------------------------------|---------------------|
| <b>Title and abstract</b>        |         |                                                                                                                                                                                             |                     |
|                                  | 1a      | Identification as a randomised trial in the title                                                                                                                                           | 3                   |
|                                  | 1b      | Structured summary of trial design, methods, results, and conclusions (for specific guidance see CONSORT for abstracts)                                                                     | 2-3                 |
| <b>Introduction</b>              |         |                                                                                                                                                                                             |                     |
| Background and objectives        | 2a      | Scientific background and explanation of rationale                                                                                                                                          | 4                   |
|                                  | 2b      | Specific objectives or hypotheses                                                                                                                                                           | 5                   |
| <b>Methods</b>                   |         |                                                                                                                                                                                             |                     |
| Trial design                     | 3a      | Description of trial design (such as parallel, factorial) including allocation ratio                                                                                                        | 8                   |
|                                  | 3b      | Important changes to methods after trial commencement (such as eligibility criteria), with reasons                                                                                          | n.a.                |
| Participants                     | 4a      | Eligibility criteria for participants                                                                                                                                                       | 9-11                |
|                                  | 4b      | Settings and locations where the data were collected                                                                                                                                        | 11-12               |
| Interventions                    | 5       | The interventions for each group with sufficient details to allow replication, including how and when they were actually administered                                                       | 5-8                 |
| Outcomes                         | 6a      | Completely defined pre-specified primary and secondary outcome measures, including how and when they were assessed                                                                          | 11-15               |
|                                  | 6b      | Any changes to trial outcomes after the trial commenced, with reasons                                                                                                                       | n.a.                |
| Sample size                      | 7a      | How sample size was determined                                                                                                                                                              | 8-9                 |
|                                  | 7b      | When applicable, explanation of any interim analyses and stopping guidelines                                                                                                                | n.a.                |
| <b>Randomisation:</b>            |         |                                                                                                                                                                                             |                     |
| Sequence generation              | 8a      | Method used to generate the random allocation sequence                                                                                                                                      | 10-11               |
|                                  | 8b      | Type of randomisation; details of any restriction (such as blocking and block size)                                                                                                         | 10-11               |
| Allocation concealment mechanism | 9       | Mechanism used to implement the random allocation sequence (such as sequentially numbered containers), describing any steps taken to conceal the sequence until interventions were assigned | 10-11               |
| Implementation                   | 10      | Who generated the random allocation sequence, who enrolled participants, and who assigned participants to interventions                                                                     | 10-11               |
| Blinding                         | 11a     | If done, who was blinded after assignment to interventions (for example, participants, care providers, those                                                                                | n.a.                |

|    |                          |                                                             |                                                                                                                  |
|----|--------------------------|-------------------------------------------------------------|------------------------------------------------------------------------------------------------------------------|
| 1  |                          | assessing outcomes) and how                                 |                                                                                                                  |
| 2  | 11b                      | If relevant, description of the similarity of interventions | n.a.                                                                                                             |
| 3  | Statistical methods      | 12a                                                         | Statistical methods used to compare groups for primary and secondary outcomes                                    |
| 4  |                          | 12b                                                         | Methods for additional analyses, such as subgroup analyses and adjusted analyses                                 |
| 5  |                          |                                                             | 16-18                                                                                                            |
| 6  |                          |                                                             | 16-18                                                                                                            |
| 7  | <b>Results</b>           |                                                             |                                                                                                                  |
| 8  | Participant flow (a      | 13a                                                         | For each group, the numbers of participants who were randomly assigned, received intended treatment, and         |
| 9  | diagram is strongly      |                                                             | were analysed for the primary outcome                                                                            |
| 10 | recommended)             | 13b                                                         | For each group, losses and exclusions after randomisation, together with reasons                                 |
| 11 | Recruitment              | 14a                                                         | Dates defining the periods of recruitment and follow-up                                                          |
| 12 |                          | 14b                                                         | Why the trial ended or was stopped                                                                               |
| 13 |                          |                                                             | n.a.                                                                                                             |
| 14 | Baseline data            | 15                                                          | A table showing baseline demographic and clinical characteristics for each group                                 |
| 15 | Numbers analysed         | 16                                                          | For each group, number of participants (denominator) included in each analysis and whether the analysis was      |
| 16 |                          |                                                             | by original assigned groups                                                                                      |
| 17 |                          |                                                             | n.a.                                                                                                             |
| 18 | Outcomes and             | 17a                                                         | For each primary and secondary outcome, results for each group, and the estimated effect size and its            |
| 19 | estimation               |                                                             | precision (such as 95% confidence interval)                                                                      |
| 20 |                          | 17b                                                         | For binary outcomes, presentation of both absolute and relative effect sizes is recommended                      |
| 21 | Ancillary analyses       | 18                                                          | Results of any other analyses performed, including subgroup analyses and adjusted analyses, distinguishing       |
| 22 |                          |                                                             | pre-specified from exploratory                                                                                   |
| 23 |                          |                                                             | n.a.                                                                                                             |
| 24 | Harms                    | 19                                                          | All important harms or unintended effects in each group (for specific guidance see CONSORT for harms)            |
| 25 |                          |                                                             | n.a.                                                                                                             |
| 26 | <b>Discussion</b>        |                                                             |                                                                                                                  |
| 27 | Limitations              | 20                                                          | Trial limitations, addressing sources of potential bias, imprecision, and, if relevant, multiplicity of analyses |
| 28 | Generalisability         | 21                                                          | Generalisability (external validity, applicability) of the trial findings                                        |
| 29 |                          |                                                             | n.a.                                                                                                             |
| 30 | Interpretation           | 22                                                          | Interpretation consistent with results, balancing benefits and harms, and considering other relevant evidence    |
| 31 |                          |                                                             | n.a.                                                                                                             |
| 32 | <b>Other information</b> |                                                             |                                                                                                                  |
| 33 | Registration             | 23                                                          | Registration number and name of trial registry                                                                   |
| 34 | Protocol                 | 24                                                          | Where the full trial protocol can be accessed, if available                                                      |
| 35 |                          |                                                             | n.a.                                                                                                             |
| 36 | Funding                  | 25                                                          | Sources of funding and other support (such as supply of drugs), role of funders                                  |

37  
38 \*We strongly recommend reading this statement in conjunction with the CONSORT 2010 Explanation and Elaboration for important clarifications on all the items. If relevant, we also  
39 recommend reading CONSORT extensions for cluster randomised trials, non-inferiority and equivalence trials, non-pharmacological treatments, herbal interventions, and pragmatic trials.  
40 Additional extensions are forthcoming: for those and for up to date references relevant to this checklist, see [www.consort-statement.org](http://www.consort-statement.org).  
41  
42  
43

1  
2 The „Eigenständig werden“ prevention trial: a cluster randomised controlled study on a  
3 school-based life skills programme to prevent substance use onset  
4  
5  
6

7 Study protocol and baseline characteristics  
8  
9  
10  
11  
12  
13  
14  
15  
16  
17  
18  
19  
20  
21  
22  
23  
24  
25  
26  
27  
28  
29  
30  
31  
32  
33  
34  
35  
36  
37  
38  
39  
40  
41  
42  
43  
44  
45  
46  
47  
48  
49  
50  
51  
52  
53  
54  
55  
56  
57  
58  
59  
60

For peer review only

## Abstract

### Background

The aim of this study is the implementation and evaluation of “Eigenständig werden 5+6” (“Becoming Independent 5+6”), a school-based curriculum for grade 5 and 6 developed upon evidence-based criteria for effective drug prevention curricula in schools. Evaluation of the programme includes efficacy, feasibility, and practicability in daily school routine.

### Methods and analysis

The intervention “Eigenständig werden 5+6” consists of 14 teaching units evenly distributed over grades five and six which are interactively delivered, and a parent component. Programme effects are studied in a four wave cluster randomised controlled trial with two arms, an intervention and a control condition. Self-completed questionnaires from students and teachers are collected by trained research staff. 45 schools, 172 classes and 3,444 students with a mean age of 10.37 years (SD=.59) and 47.9% girls from four federal states in Germany were assessed at baseline. 1,685 students in 81 classes were assigned to intervention classes, 1,759 students in 91 classes to control arm.

No differences between conditions were either found for age, gender, immigration background, socio-economic status, substance use, or life skills at baseline. Exceptions are higher self-efficacy ( $t(3438)=2.34, p=.02, d=.08$ ) and empathy ( $t(3302)=2.4, p=.02, d=.09$ ) reported for control group whereas class climate seems better in intervention condition ( $t(3037)=2.01, p=.05, d=.07$ ), but effect sizes state marginal differences.

### Ethics and dissemination

Ethical approval was granted by the Ethics Committee of the Medical Faculty of the University of Kiel. The study was approved by respective Ministries of Education.

### Conclusion

Baseline data suggest that the initial conditions are favourable for testing programme efficacy since distribution of baseline levels of the outcomes does not differ in intervention and control condition, except negligible differences between self-efficacy and empathy higher in the

Formatted: English (U.K.)

1  
2 control group and class climate higher in the intervention group.

3  
4 [Trial registration: Current Controlled Trials ISRCTN99442407](#)

## 5 6 7 [Article Summary](#)

### 8 9 10 [Article focus](#)

11  
12  
13  
14  
15 [- The focus of this study is to implement and evaluate a school-based curriculum for students](#)  
16 [in grade five and six, developed upon evidence-based criteria for effective drug prevention](#)  
17 [curricula in schools.](#)

18  
19  
20  
21 [- It is hypothesised that the intervention will lead to an increase of general life skills, refusal](#)  
22 [skills, and knowledge about substance use. These enhancements should be accompanied](#)  
23 [by a lower likelihood of smoking onset and alcohol consumption.](#)

### 24 25 26 27 [Key messages](#)

28  
29  
30  
31 [- Due to inconsistent results concerning long-term effects and effective programme](#)  
32 [components of school-based prevention programmes, there is a need for further research in](#)  
33 [this field. This trial addresses this need.](#)

### 34 35 36 37 [Strengths and limitations](#)

#### 38 39 40 [- Strengths:](#)

41  
42 [o This cluster randomised controlled trial includes a large sample of adolescents.](#)

43  
44 [o A wide spectrum of outcomes and confounders will be assessed in four waves including](#)  
45 [not only post-test but also follow-up](#)

#### 46 47 48 [Limitations:](#)

49  
50 [o Self-reports of students may be a limiting factor to this study.](#)



## BACKGROUND

### Introduction

Albeit lifetime smoking prevalence at the age between 12 and 17 years has declined in Germany over the last decade [1], substance abuse is still one of the major threats to adolescent's health in Germany and Western cultures in general [2,3]. In particular, tobacco smoking and alcohol consumption are serious problems not only for adolescent but also for adulthood health considering that juvenile behavioural pattern such as smoking will presumably establish itself in adulthood, since the majority of adult smokers report having started at an early age [4-6]. Especially adolescents aged between 12 and 14 years represent the high risk group for an onset of alcohol consumption and smoking initiation. Preventing juvenile substance use is therefore an important aim to avoid premature mortality and morbidity and to pave the way for a healthy lifestyle.

School-based prevention programs are considered to be one of the most appropriate and suitable strategies to tackle substance use [7-9]. Informational programs seem not as effective as those that focus on psychosocial strategies and educate adolescents about social norms and influences [10]. Another promising approach to promote a healthy lifestyle is the development and improvement of general life skills [11], skills for resisting social influence and substance-specific skills in adolescence [12]. General life skills empower adolescents in challenging situations, help to master life as competent as possible as well as to deal effectively with the realities of life, and help to prevent substance use and addiction. Enabling children to acquire knowledge and developing attitudes and life skills which support the adoption of healthy behaviours is an approach strongly recommended by the World Health Organization (WHO) [13]. For this reason, some primary prevention programs are based on the life skills approach even though the empirical evidence of the efficacy of these programs is rather weak [14]. Research on effective program components as well as on long-term effects have shown inconsistent results [7,15,16] and further research is needed.

## Aims and hypotheses

The focus of this study is to implement and evaluate a school-based curriculum for students in grade five and six, developed upon evidence-based criteria for effective drug prevention curricula in schools. The overall aim of this school-based curriculum is the prevention of substance use and addiction by increasing substance specific skills and general life skills of students in grade five and six. To evaluate effects as well as feasibility and practicability of the program, a four-wave controlled study is conducted in daily school routine.

“Eigenständig werden 5+6” (“Becoming independent 5+6”) is a universal school-based prevention program for grade five and six based on the social influence model and on the life skills approach. It contains substance-specific as well as substance-unspecific elements and takes quality criteria of effective prevention programs into account [8,17-19]. It is expected that participation in the prevention program will lead to lower rates of adolescent’s smoking initiation and to abstinence from alcohol or at least to a more responsible consumption. The program is designed to address both the social and psychological factors promoting the onset of tobacco smoking and drinking alcohol by attempting to increase the students' ability to cope with pressures to smoke and to drink and to decrease student’s susceptibility to pro-smoking and pro-alcohol social influences. It targets at the improvement of students' refusal skills and their ability to cope with emotions, stress and problems. Overall, dependent variables to be influenced by the prevention program are use of tobacco and alcohol, smoking-related and alcohol-related knowledge, intentions and attitudes towards substance use, susceptibility to smoking cigarettes and alcohol and general life skills, social skills as well as substance-specific refusal skills.

## METHODS AND ANALYSIS

### Intervention

“Eigenständig werden 5+6” was designed by an interdisciplinary team of psychologists, sports scientists and pedagogues. The prevention program consists of twelve 45- to 90-

1  
2 minute units. The units are evenly distributed over grades five and six and include the  
3  
4 following components: life skills (i.e. problem solving, critical thinking, effective  
5  
6 communication skills, decision-making, interpersonal relationship skills, self-awareness  
7  
8 building skills, empathy, coping with stress, and emotions), student's ability to work in a  
9  
10 group and substance specific skills. To facilitate the accomplishment of the prevention  
11  
12 program, an order of units was predetermined.

13 In addition, alcohol and smoking are addressed in two workshops lasting four till six hours.

14  
15 The workshops include several activities about substance use such as smoking cigarettes  
16  
17 and alcohol abuse, and will be carried out at the end of grade five and six. Profound  
18  
19 knowledge and skills will be conveyed in these workshops by providing different learning  
20  
21 stations for students. Students can choose in what order they do the stations but are required  
22  
23 to complete all of them. At the end of grade five, tobacco smoking is the general topic  
24  
25 whereas alcohol consumption will be addressed at the end of grade six. [Table 1 displays an](#)  
26  
27 [overview of the interventions' contents.](#)  
28  
29  
30  
31  
32  
33  
34  
35  
36  
37  
38  
39  
40  
41  
42  
43  
44  
45  
46  
47  
48  
49  
50  
51  
52  
53  
54  
55  
56  
57  
58  
59  
60

Table 1. Overview of interventions' contents.

| <u>Parent evening 1: Overall introduction to the programme</u>                                                                                 |                                                                                                                                                           |                                                                                  |
|------------------------------------------------------------------------------------------------------------------------------------------------|-----------------------------------------------------------------------------------------------------------------------------------------------------------|----------------------------------------------------------------------------------|
| <u>Unit</u>                                                                                                                                    | <u>Length/ Contents</u>                                                                                                                                   | <u>Parent leaflet (contents)</u>                                                 |
| <u>5.1 Klasse sein - Gemeinschaft werden (Class community)</u>                                                                                 | <u>45 min: introduction, familiarisation, relationships</u>                                                                                               | <u>Introduction to the programme and overview</u>                                |
| <u>5.2 Klassenregeln (Class rules)</u>                                                                                                         | <u>90 min: development of class rules, incentives and sanctions</u>                                                                                       | <u>Explanation for the need of rules</u>                                         |
| <u>5.3 Miteinander sprechen (Communication)</u>                                                                                                | <u>90 min: communication skills and self-assertion</u>                                                                                                    | --                                                                               |
| <u>5.4 Feedback (Feedback)</u>                                                                                                                 | <u>90 min: how to provide and get feedback</u>                                                                                                            | --                                                                               |
| <u>5.5 Klassenrat (Class board)</u>                                                                                                            | <u>45 min: introduction of a class board, social learning</u>                                                                                             | <u>Introduction of a family board</u>                                            |
| <u>5.6 Und was jetzt? (How to solve problems)</u>                                                                                              | <u>90 min: learning of a useful strategy of solving problems (five-finger-strategy)</u>                                                                   | <u>Introduction of the five-finger-strategy</u>                                  |
| <u>5.7 Weniger ist mehr/Liebe Gewohnheiten (Less is more-beloved habits)</u>                                                                   | <u>135 min: developing awareness of addiction, habits, rituals</u>                                                                                        | <u>Explanation for the need of learning about habits, rituals, and addiction</u> |
| <u>Aktionssparcours Nikotin (Workshop: Smoking cigarettes)</u>                                                                                 | <u>4-6 hours: nine different tasks with topics concerning smoking (e.g. risks, components, consequences of addiction, self-resistance, peer pressure)</u> | <u>Information of rules that help to prevent smoking onset</u>                   |
| <u>Parent evening 2: Topic Smoking:<br/>Leading Questions: why does the child learn about smoking and how can it be supported?</u>             |                                                                                                                                                           |                                                                                  |
| <u>6.1 Gemeinsam lernen (Learning together)</u>                                                                                                | <u>90 min: learning to cooperate, working in a team</u>                                                                                                   | --                                                                               |
| <u>6.2 Mit Gefühl (Sentimentally)</u>                                                                                                          | <u>90 min: cognition and expression of comfortable and unpleasant emotions like fear, anger, sadness, happiness</u>                                       | <u>Explanation for the need of expressing emotions</u>                           |
| <u>6.3 Stärken stärken (Strengthening my strengths)</u>                                                                                        | <u>90 min: empathy and self-awareness, strengths and weaknesses</u>                                                                                       | <u>How to support the child in recognising its strengths and weaknesses</u>      |
| <u>6.4 Anders sein (Being different)</u>                                                                                                       | <u>45 min: learning to accept of being different</u>                                                                                                      | --                                                                               |
| <u>6.5 Konflikte lösen (Dealing with conflicts)</u>                                                                                            | <u>90 min: learning of a strategy to deal with conflicts in an adequate and peaceful manner</u>                                                           | <u>How to support the child in dealing with conflicts</u>                        |
| <u>6.6. Stress und Entspannung (Stress and relaxation)</u>                                                                                     | <u>90 min: realising the importance of relaxation, methods to handle stressful situations</u>                                                             | <u>How to support the child in handling stressful situations</u>                 |
| <u>6.7 Mobbing (Bullying)</u>                                                                                                                  | <u>90 min: learning of recognising and realising bullying, strategies to prevent it and to help if it occurs</u>                                          | <u>Realising bullying, support the child if it is bullied</u>                    |
| <u>Aktionssparcours Alkohol (Workshop: Alcohol)</u>                                                                                            | <u>4-6 hours: nine different tasks with topics concerning alcohol consumption (e.g. risks, consequences of addiction, self-resistance, peer pressure)</u> | <u>Information about rules and support</u>                                       |
| <u>Parent evening 3: Topic Alcohol:<br/>Leading Questions: why does the child learn about alcohol consumption and how can it be supported?</u> |                                                                                                                                                           |                                                                                  |

1  
2 The entire prevention program is conducted by the teachers in classroom during usual  
3 school lessons. Teachers receive a manual which provides specific instructions and  
4 background information that is needed to conduct the units and they took part in a two day  
5 training course that was carried out by especially qualified prevention experts. To develop life  
6 skills, miscellaneous teaching methods, such as interactive didactics, working in small  
7 groups, relaxation exercises, pantomime, identification figures, and active games are used.  
8 Units as well as workshops include working sheets and several background information and  
9 instructions.

10  
11 Additionally, the program involves parents by providing three parent-teacher conferences  
12 and different informational material to keep them informed on their children's subjects. The  
13 informational materials include suggestions and rules on how to support their children. To  
14 take families with an immigration background into consideration, all parental information are  
15 also available in Turkish and Russian.

### Study Design

Deleted: ¶

16  
17 To evaluate effects of "Eigenständig werden 5+6", a four-wave cluster randomised controlled  
18 trial with two arms, an intervention and a control condition, is conducted. The intervention  
19 group takes part in the prevention programme and will be compared with the non-treated,  
20 "usual curriculum" control group. The actual intervention duration is from the beginning in  
21 grade five (October/November 2010) till the end of grade six, spanning a period of two school  
22 years. The randomisation occurred at school level to avoid information exchange between  
23 the conditions in the schools. Data are collected prior to the start of the intervention  
24 (September/October 2010), at the end of grade five (June/July 2011), at the end of grade six  
25 (June/July 2012) and in the middle of grade seven (December 2012).

### Calculated sample size

26  
27 The cluster randomised trial involves randomising social units or clusters of individuals rather  
28 than individuals themselves. Specific constraints must be considered during planning and  
29 analysis [20]. Indeed, the responses of individuals within a cluster tend to be more similar

1  
2 than those of individuals of different clusters. The clustering effect is defined as  $1 + (m - 1)\rho$ ,  
3  
4 where  $m$  is the average number of subjects per cluster and  $\rho$  the intraclass correlation  
5  
6 coefficient (ICC) [21]. Values of ICC for smoking and drinking behaviour were taken from the  
7  
8 EU Drug Addiction Prevention Trial [22], and were estimated with approximately 0.02, which  
9  
10 is in line with other estimations [23].

11 Power calculations were run with a sample size calculator for cluster randomized trials [24].  
12  
13 Based on earlier experiences, a drop-out rate of 25% was hypothesized. Taking as current  
14  
15 estimates, the lifetime smoking prevalence at the age between 12 and 17 years (at the time  
16  
17 of the follow-up tests the age of most students will be approximately 13 till 14 years) was  
18  
19 valued with 43% [25], whereas the lifetime prevalence of alcohol consumption at the age  
20  
21 between 11 and 17 years was estimated with 64% [26].

22 Applying a significance level of  $\alpha=0.05$ ,  $\text{power}=0.80$ , a 15% prevention effect, and an  
23  
24 average number of 20 students per class ( $m$ ), the power calculations resulted in a recom-  
25  
26 mended sample size of 158 classes and 3,160 students.  
27

### 28 **Sample recruitment**

29  
30 Sample recruitment took place in four German federal states: Schleswig-Holstein, North-  
31  
32 Rhine-Westphalia, Hesse and Bremen. In order to achieve a balanced representation of  
33  
34 social strata, complete lists of all secondary schools (except schools with students for special  
35  
36 needs) of selected regions in Schleswig-Holstein, North-Rhine-Westphalia, and Hesse were  
37  
38 obtained from the Ministries of Education of each federal state. In Bremen, all secondary  
39  
40 schools were included. Invited school types range from *Gymnasium* which is defined as a  
41  
42 school for students who have high academic skills and aim for university-entrance diploma  
43  
44 after accomplishment, to *Realschule*, *Hauptschule* and *Regionalschule* that focus on  
45  
46 students with lower academic skills compared to *Gymnasium*. After attending elementary  
47  
48 school, *Gymnasium* requires 8 till 9 years of school whereas students of *Realschule*,  
49  
50 *Hauptschule* or *Regionalschule* need to attend school for 5 till 6 years. Other school types  
51  
52  
53  
54  
55  
56  
57  
58  
59  
60

1  
2 included are *Gemeinschaftsschule* as well as *Gesamtschule* which offer all kind of degrees  
3  
4 and in which students with varying academic skills are taught together.

5  
6 Invitation letters and information sheets explaining the aims of the study were sent to the  
7  
8 head teachers of 450 secondary schools in the study regions. Schools were invited to  
9  
10 participate in the trial with all classes in grade five and were sent a detailed memorandum of  
11  
12 understanding to sign and to obtain head teachers' written commitment to the trial. The  
13  
14 importance of the randomized design was emphasized and it was made clear to schools that  
15  
16 it would be preferable for them to decline participation rather than to join the study and  
17  
18 withdraw commitment at a later point. Schools agreeing to participate registered for the study  
19  
20 by indicating general interest and the number of fifth grade classes interested in the study,  
21  
22 the names of the class teachers and the number of students per class. In addition, schools  
23  
24 could ask for visits of the project staff to receive first hand information on the requirements of  
25  
26 the trial.

27  
28 323 out of 450 schools invited did neither express approval nor disapproval, whereas 79  
29  
30 schools with approximately 180 fifth grade classes denied their participation mostly due to  
31  
32 shortage of time because of structural changes imposed by Ministries of Education. 48  
33  
34 schools (11%) with 191 classes and 4,772 students out of 450 schools invited decided to  
35  
36 take part in the study. The highest rate of participation was found for Hesse as 28% of all  
37  
38 schools invited decided to join the study. A lower rate can be stated for North-Rhine-  
39  
40 Westphalia (15%) and Bremen (14%) as well as for Schleswig-Holstein (8%) where only 18  
41  
42 out of 228 schools agreed to participate.

43  
44 Schools were stratified according to the following criteria: (1) study region, (2) type of school,  
45  
46 (3) number of fifth grade classes per school. According to these strata, schools were ran-  
47  
48 domly assigned to the two arms of the study with a 50 per cent chance of being allocated to  
49  
50 either group [by using coin toss method](#). Of these 48 schools agreeing to participate, 26  
51  
52 schools with 97 classes and 2,437 students were allocated to intervention group whereas 22  
53  
54 schools with 94 classes and 2,335 students were assigned to control condition. After  
55  
56 randomisation, three schools of intervention group withdrew their consent as well as four  
57  
58  
59  
60

1  
2 teachers of intervention classes refused to take part. Taking absent students and those with  
3 no parental permission into account, baseline data of 23 intervention schools with 81 classes  
4 and 1,685 students were available.  
5  
6

7  
8 In control condition, teachers of three classes withdrew consent, 361 students had no  
9 parental permission and 131 were absent at day of data collection. Therefore, baseline data  
10 of 22 schools with 91 classes and 1,759 students were collected (see Figure 1).  
11  
12

13  
14 Thus, 45 schools and 172 classes take part in the study and data of 3,444 students were  
15 assessed at baseline altogether. An overall of 592 students were not eligible because of  
16 missing parental consent. Considering the recommended sample size, the sample of 172  
17 classes with 3,444 students at baseline fits the results of the power analysis (158 classes  
18 with 3,160 students needed).  
19  
20  
21

Deleted: ¶

## 22 23 Questionnaire

24  
25 Data was collected through self-completed anonymous questionnaires by teachers and  
26 students at baseline, prior to the beginning of the intervention and will be assessed by the  
27 same method in further waves.  
28  
29

### 30 31 Questionnaire (students)

32  
33 The students' questionnaire was developed and designed, pretested and modified prior to  
34 the baseline assessment.  
35  
36

Deleted: At the beginning of the development of the

37  
38 Before starting to develop the questionnaire, a focus group of students (N=7) was  
39 interviewed to gain insight into student's environment to detect, for example, typical  
40 situations that might be stressful or that cause problems for this age group. This information  
41 helped to develop a questionnaire that is appropriate for students in grades five and six.  
42  
43 Afterwards, a first version of the questionnaire was pretested in four fifth grade classes  
44 (N=95) and additionally in two classes (N=14) in schools for children with special needs to  
45 eliminate items hard to understand as well as items with poor psychometric quality.  
46  
47  
48  
49  
50  
51  
52  
53  
54  
55  
56  
57  
58  
59  
60



1  
2 The final questionnaire assesses outcomes such as use of tobacco and alcohol consumption  
3  
4 in forms of current behaviour and lifetime prevalence, smoking-related and alcohol-related  
5  
6 knowledge, intentions and attitudes towards substance use, susceptibility to smoking  
7  
8 cigarettes and alcohol and general life skills, social skills and substance-specific refusal  
9  
10 skills. Questions concerning substance use covered own lifetime smoking prevalence  
11  
12 likewise alcohol consumption. Furthermore, frequency of current consumption, episodes of  
13  
14 drunkenness and binge drinking were investigated. Knowledge, intentions and attitudes  
15  
16 about smoking cigarettes and drinking alcohol, susceptibility along with smoking and alcohol  
17  
18 related behaviour of peers and family were included. Confounders like socio-demographic  
19  
20 characteristics, bullying, class climate and leisure time behaviour were also assessed at  
21  
22 baseline, stable traits like characteristics of personality and general parenting style will be  
23  
24 assessed at post-test, due to aspects of feasibility (especially length of questionnaire and  
25  
26 time needed for completion).

26 In general, items included in the questionnaire are based on “standard” questions used in the  
27  
28 international literature, in published questionnaires or in own previous research. Table 2  
29  
30 summarizes all variables including references.  
31  
32  
33  
34  
35  
36  
37  
38  
39  
40  
41  
42  
43  
44  
45  
46  
47  
48  
49  
50  
51  
52  
53  
54  
55  
56  
57  
58  
59  
60

Deleted: 1

Table 2. Overview of variable constructs.

Deleted: ¶

Deleted: 1

| General life skills   | Substance use (Smoking and alcohol)                      | Additional/Confounders                 |
|-----------------------|----------------------------------------------------------|----------------------------------------|
| Communication [27,28] | Smoking-related and alcohol-related knowledge            | Socio demographic characteristics [29] |
| Self esteem [30]      | Use of tobacco [31,32]                                   | General parenting style* [33]          |
| Self-efficacy [28]    | Use of alcohol [35]                                      | Personality characteristics* [36,37]   |
| Self concept [27]     | Intentions and attitudes and normative expectations [38] | Leisure time behaviour [34]            |
| Empathy [39]          | Susceptibility [40]                                      | Class climate**                        |
| Emotions [41]         | Resistance skills [42]                                   | Bullying [43,44]                       |
| Stress [45]           | Social influence [32,46]                                 |                                        |
| Problem solving [27]  | Perceived parental rules and attitudes [47,48]           |                                        |

\* Assessed at first post-test. \*\* On the basis of own previous research.

Specific values for the life skills-scales, for intentions, attitudes and perceived risks at baseline along with representative items and used response scales are displayed in table 2. If item-total correlation, difficulty or Cronbach's Alpha exceed limiting values, scales were modified for data analysis by excluding items in order to increase psychometric quality. All values shown in table 3 represent final scales. Stress, problem-solving, and handling emotions will be interpreted on single item level in order to ascertain student's strategies to handle situations and to cluster specific types.

Deleted: 2

Deleted: ¶

¶

Deleted: 2

Table 3. Internal consistency at baseline.

| Scales<br>(Item exemplification)                                                                                                                                       | Cronbach's<br>$\alpha$ | Number<br>of Items | Item-total<br>Correlation<br>$r_{it}$ | Item<br>Difficulty<br>$P_i$ in % |
|------------------------------------------------------------------------------------------------------------------------------------------------------------------------|------------------------|--------------------|---------------------------------------|----------------------------------|
| Communication<br><i>("If I talk to somebody, I will not interrupt him/her")</i><br>Response category: 4 point scale (I do not agree – I agree)                         | $\alpha = .73$         | 9                  | .35 - .48                             | 57 - 86                          |
| Self esteem<br><i>("I sometimes think that I'm no good")</i><br>Response category: 4 point scale (I do not agree – I agree)                                            | $\alpha = .70$         | 5                  | .25 - .60                             | 60 - 85                          |
| Self-efficacy<br><i>("Whatever happens, I will handle it")</i><br>Response category: 4 point scale (I do not agree – I agree)                                          | $\alpha = .61$         | 5                  | .26 - .41                             | 58 - 70                          |
| Self concept<br><i>("I'm aware of my strengths")</i><br>Response category: 4 point scale (I do not agree – I agree)                                                    | $\alpha = .67$         | 8                  | .27 - .42                             | 55 - 82                          |
| Class climate<br><i>("We help each other")</i><br>Response category: 4 point scale (I do not agree – I agree)                                                          | $\alpha = .73$         | 9                  | .35 - .48                             | 57 - 86                          |
| Bullying<br><i>("How often have you taken part in bullying (kicking, beating) another student?")</i><br>Response category: 5 point scale<br>(Never - Few times a week) | $\alpha = .71$         | 3                  | .51 - .57                             | 5 - 13                           |
| Victimization<br><i>("How often have you been bullied (kicking, beating) by another student?")</i><br>Response category: 5 point scale<br>(Never - Few times a week)   | $\alpha = .78$         | 3                  | .57 - .67                             | 14 - 22                          |
| Smoking-related perceived risks<br><i>("I will be sick")</i><br>Response category: 4 point scale (Surely not - Surely yes)                                             | $\alpha = .76$         | 6                  | .43 - .58                             | 60 - 78                          |
| Alcohol-related perceived risks<br><i>("I will be sick")</i><br>Response category: 4 point scale (Surely not - Surely yes)                                             | $\alpha = .79$         | 5                  | .53 - .61                             | 63 - 80                          |

### Questionnaire (teachers)

Teachers were asked to complete a questionnaire to assess class climate. They should evaluate working atmosphere including student's ability to work together, concentration, motivation, and pace of work, student's ability to solve problems, the corporate feeling of the class as well as the relationship between students and teachers by assigning marks from 1 (very good) up to 6 (very poor). Cronbach's Alpha of class climate scale is acceptable ( $\alpha=.86$ ,  $r_{ii} \geq .41$ ).

### Process evaluation

Teachers of the intervention group will additionally evaluate the implementation of the intervention programme and feasibility of every unit they will conduct. They were instructed while attending the teacher training and received questionnaires to document the process of implementation of "Eigenständig werden 5+6". These questionnaires cover the following information: date and duration of implementation, number of students attending the class, whether each of the core activities was or was not implemented, and a final judgment of the unit. By leaving space for open commentaries, teachers were encouraged to report their opinion on the units and activities as well as for anything else they want to comment. Furthermore, they should appraise the units' age-appropriateness and contents, and students' participation in the units.

### Assessment procedure

The assessment was planned by asking schools about their preferred date and time for data collection at the beginning of grade five. Contemporaneously, teachers collected the parental permission of all students in class. In three regions, passive parental permission was used, i.e. parents had to refuse to take part in the study rather than to agree. In one region, an active permission was requested by the respective Ministry, i.e. parents had to agree in case they complied with participation. Teachers registered all names of students with no permission in a list which should be saved in the schools throughout the entire trial. All students with refusal are excluded from all assessments. To permit a linking of individual

1  
2 information on subsequent surveys while assuring anonymity, each questionnaire is labelled  
3  
4 with a seven-digit individual code generated by the student. This procedure has been tested  
5  
6 and used in several studies and therefore been inspected and approved by ethics committee,  
7  
8 data protection and Ministries of Education repeatedly [49].

9  
10 Data assessment was conducted in the class room and lasted 45 minutes. Project staff was  
11  
12 responsible for the distribution, help in completion and collection of the questionnaire.

13  
14 Teachers were not involved. At the end of the assessment, all questionnaires which were  
15  
16 completely filled out were placed in an envelope and sealed in front of the class. Every  
17  
18 student was therefore assured that neither teachers nor parents were able to see the  
19  
20 completed questionnaire.

21  
22 79% (2,719) of all students were able to complete the questionnaire in 45 minutes. Students,  
23  
24 who were not able to complete the entire questionnaire in 45 minutes, received a prepaid  
25  
26 envelope. While the completed pages were collected by the staff, the students marked their  
27  
28 own individual code on the last page, completed the unfilled pages of the questionnaire and  
29  
30 anonymously sent it back to the project team. 46 % (331) of the students sent the pages  
31  
32 back. Taking the questionnaires of absent students as well as afterwards sent pages into  
33  
34 account, an overall of 2,922 data sets is complete at baseline. 522 data sets contain missing  
35  
36 values on at least one page. Absent students were given a questionnaire and instructions in  
37  
38 a prepaid envelope. After completion, they sent it back to the project team. An overall of 180  
39  
40 questionnaires were left in schools for absent students. 95 of these questionnaires (53%)  
41  
42 were sent back completely filled out.

### 43 **Baseline characteristics**

44  
45 A total number of 45 schools, 172 classes and 3,444 students with a mean age of 10.37  
46  
47 years (SD=.59) and 47.9% girls from four federal states in Germany were assessed at  
48  
49 baseline. Baseline data suggest that the initial conditions are favourable for testing  
50  
51 programme efficacy, since distribution of baseline levels of the outcomes does not differ in  
52  
53 intervention and control condition. Exceptions are higher self-efficacy ( $t_{(3438)}=2.34$ ,  $p=.02$ ,

1  
2 d=.08) and empathy ( $t_{(3302)}=2.4$ ,  $p=.01$ ,  $d=.09$ ) reported for control students, whereas class  
3  
4 climate, rated by students, seems better in intervention condition ( $t_{(3037)}=2.01$ ,  $p=.05$ ,  $d=.07$ ),  
5  
6 but effect sizes state marginal differences. Different distribution between the intervention and  
7  
8 the control arm at baseline assessment was also found for school type with a higher  
9  
10 proportion of students of *Gymnasiums* in control condition ( $X^2_{(1)}=17.7$ ,  $p=.001$ ). Differences  
11  
12 between the intervention and control condition were neither found for age, gender,  
13  
14 immigration background nor socio-economic status. Likewise, no significant differences  
15  
16 between intervention and control condition were found for teacher's evaluation of class  
17  
18 climate.

19 Table 4 shows the characteristics of the baseline survey for intervention and control condition  
20  
21 and displays test statistics of differences between the conditions. Since responses of  
22  
23 students within their classes tend to be more similar than those of students of other classes,  
24  
25 the intra-class correlation coefficients for substance use are displayed as well.  
26  
27  
28  
29  
30  
31  
32  
33  
34  
35  
36  
37  
38  
39  
40  
41  
42  
43  
44  
45  
46  
47  
48  
49  
50  
51  
52  
53  
54  
55  
56  
57  
58  
59  
60

Deleted: 3

Deleted: 3

Table 4. Characteristics at the baseline survey.

| Baseline characteristics                                | Group                  |             |                   |             | Difference |                                                                              |
|---------------------------------------------------------|------------------------|-------------|-------------------|-------------|------------|------------------------------------------------------------------------------|
|                                                         | Intervention (n=1,685) |             | Control (n=1,759) |             |            |                                                                              |
|                                                         | N/ M (SD)              | %           | N/ M (SD)         | %           |            |                                                                              |
| Gender                                                  | Boys                   | 866         | 51.5              | 926         | 52.8       | $X^2_{(1)}=0.51, p=.48$                                                      |
|                                                         | Girls                  | 816         | 48.5              | 831         | 47.3       |                                                                              |
| Age                                                     |                        | 10.38 (.60) |                   | 10.35 (.58) |            | $t_{(3433)}=1.27, p=.21$                                                     |
| School type                                             | Gymnasium              | 620         | 36.8              | 771         | 43.7       | $X^2_{(1)}=17.7, p=.001$                                                     |
|                                                         | Others                 | 1,065       | 63.2              | 988         | 56.3       |                                                                              |
| Socio-economic status*                                  | Yes                    | 372         | 22.3              | 409         | 23.3       | $t_{(3439)}=0.01, p=.99$                                                     |
|                                                         | None                   | 1,575       | 94.4              | 1,629       | 93.6       |                                                                              |
| Lifetime smoking                                        | Only a few puffs       | 51          | 3.1               | 63          | 3.6        | $X^2_{(4)}=2.6, p=.63$<br>ICC <sub>CI</sub> =.02<br>ICC <sub>Sch</sub> =.03  |
|                                                         | 1 -19 cigarettes       | 37          | 2.2               | 40          | 2.3        |                                                                              |
|                                                         | 20-100 cigarettes      | 5           | .30               | 5           | .29        |                                                                              |
|                                                         | > 100 cigarettes       | 1           | .06               | 4           | .23        |                                                                              |
| Current smoking                                         | No                     | 1,657       | 98.8              | 1,724       | 98.6       | $X^2_{(4)}=1.5, p=.83$<br>ICC <sub>CI</sub> =.01<br>ICC <sub>Sch</sub> =.01  |
|                                                         | Yes                    | 21          | 1.2               | 25          | 1.4        |                                                                              |
| Lifetime alcohol consumption                            | No                     | 1,089       | 65.3              | 1,107       | 63.6       | $X^2_{(2)}=1.8, p=.40$<br>ICC <sub>CI</sub> =.05<br>ICC <sub>Sch</sub> =.02  |
|                                                         | Yes                    | 576         | 34.5              | 631         | 36.3       |                                                                              |
| Lifetime alcohol consumption without parent's knowledge | No                     | 1,603       | 96.0              | 1,673       | 96.1       | $X^2_{(1)}=1.02, p=.60$<br>ICC <sub>CI</sub> =.09<br>ICC <sub>Sch</sub> =.02 |
|                                                         | Yes                    | 64          | 4.0               | 67          | 3.9        |                                                                              |
| Current alcohol consumption ("in the last 30 days")     | Never                  | 1,572       | 94.1              | 1,642       | 94.4       | $X^2_{(2)}=1.6, p=.44$<br>ICC <sub>CI</sub> =.01<br>ICC <sub>Sch</sub> =.004 |
|                                                         | On 1-2 days a month    | 85          | 5.1               | 77          | 4.4        |                                                                              |
|                                                         | ≥3 days a month        | 14          | 0.8               | 20          | 1.2        |                                                                              |

\*Socio-economic status was measured by Family Affluence Scale [29]; sum of two items: (range from 0 up to 3, a higher mean represents a higher socio-economic status). Abbreviation: CI=classes, Sch=scho

## Statistical analysis

To test efficacy of the programme and to give consideration to cluster effects, i. e. higher similarity of responses within a cluster than between different clusters, multilevel modelling will be carried out. Therefore, 4-level models including levels of school, classes, individuals, and waves with random intercepts for school, classes and individuals will be conducted. Condition and covariates will be considered as fixed effects.

Formatted: English (U.K.)

Formatted: English (U.K.)

Formatted: English (U.K.)

In order to test effective programme components mediation analysis will be performed.

**Deleted:** To test efficacy of the programme and to give consideration to cluster effects, state of the art analyses in this field including multilevel modelling will be carried out.

In a first step, it can be analysed if the lessons of prevention programme have affected what they ought to affect: Students of the intervention group should have higher substance-specific competencies and also higher substance-unspecific skills. In a second step, it can be analysed if a given change in substance use (=dependent variable) in the intervention group is mediated by (1) the substance-specific skills, (2) the substance-unspecific skills, (3) by both, or (4) by neither nor.

Attrition analyses will be conducted to compare students who retain in intervention with the students lost to follow up and test for differences between conditions.

## ETHICS AND DISSEMINATION

Prior to the evaluation, the trial was approved and registered by the ethics committee of the Medical Faculty of the University of Kiel (AZ D 419/10) and approved by Ministries of Education. Parents were fully informed about the trial and its aim. Depending on the federal state, parental consent had to be given either in form of an active agreement or in form of a passive agreement. Students with no parental consent are excluded from all assessments. Anonymity is assured by using a seven-digit individual code that is generated by each student. The assessments are optional and each student can deny completing the questionnaire without any explanation.



## CONCLUSION

The aim of the “Eigenständig werden 5+6” trial is to evaluate the efficacy of a school-based prevention program for substance use. It involves more than 3,000 students from four federal states of Germany.

During the recruitment of the study population, only 28% of all invited schools reported if they want to join the study or not. A three-fold rate did not give a feedback at all. The most likely explanation for this low feedback rate is that schools are busy with class organization prior to the beginning of the school year. Beyond that, structural changes imposed by the Ministries of Education at time of recruitment come to the fore in terms of combining schools and restructuring school types which complicated the situations for schools. Nevertheless, the calculated sample size was accomplished.

After randomisation three classes from control group and 16 classes from intervention group withdrew the consent to participate. Since all of these classes did so after the randomization, it is assumed that schools and teachers probably underestimated the effort and commitment for participating in the study. Unfortunately, two schools of intervention condition that dropped out were *Gymnasiums*. Therefore, a difficulty that might bias outcome effects is the higher proportion of students who attend schools with higher academic requirements in control condition. But distribution represents conservative bias due to assumptions that socioeconomic status as well as a higher education level mediates substance use. Initial conditions seem therefore to be favourable since no baseline difference between conditions were reported, except school type and marginal difference between self-efficacy, empathy and class climate.

The use of self-completed questionnaires could be a limitation to this study. Indeed, the risk of over or under reporting from students or the tendency to project favourable images of oneself (social desirability) are major problems in studies using self-reports. Due to randomization, these potential limiting factors should be evenly distributed over both conditions. Nonetheless, use of self-report is an inevitable procedure when including a large

number of participants. Furthermore, general set-ups in this study like anonymisation of information [50], non-involvement of teachers and parents while data assessment might reduce limitation factors.

It is hypothesised that the intervention will lead to an increase of general life skills, refusal skills, and knowledge about substance use. These enhancements should be accompanied by a lower likelihood of smoking onset and alcohol consumption. By evaluating process, aspects of acceptance, feasibility, and practicability of the programme as well as of fidelity of the implementation will be considered. Teachers' feedbacks can be used for improving materials if necessary. Should we be able to confirm the hypotheses, an effective programme can be implemented in several schools in order to prevent adolescent substance use.

This work was supported by German Cancer Aid, grant number No. 108374. The authors have declared no competing interests.

Formatted: Font: 11 pt

Formatted: Line spacing: single

Formatted: English (U.K.)

Formatted: English (U.K.)

Deleted: ¶

### Contributor Statement

JH drafted the manuscript, participated in acquisition of data, and performed statistical analysis and interpretation of data.

Formatted: English (U.K.)

Formatted: Line spacing: single

RH contributed to study concept and design, study supervision and critical revision of the manuscript for important intellectual content.

KM developed and pretested the questionnaire, participated in acquisition of data and statistical analysis, and critically revised the manuscript.

BI contributed to study concept and design, study supervision and critical revision of the manuscript for important intellectual content, participated in drafting the manuscript,

acquisition of data and its analysis and interpretation.  
All authors read and approved the final manuscript.

## Reference List

1. Bundeszentrale für gesundheitliche Aufklärung. *Der Tabakkonsum Jugendlicher und junger Erwachsener in Deutschland 2010. Ergebnisse einer aktuellen Repräsentativbefragung und Trends*. Köln: Bundeszentrale für gesundheitliche Aufklärung; 2011.
2. Eaton DK, Kann L, Kinchen S, *et al*. Youth risk behavior surveillance--United States, 2005. *MMWR Surveill Summ* 2006;**55**:1-108.
3. Warren CW, Jones NR, Eriksen MP, *et al*. Patterns of global tobacco use in young people and implications for future chronic disease burden in adults. *Lancet* 2006;**367**:749-753.
4. Chassin L, Presson CC, Sherman SJ, *et al*. The natural history of cigarette smoking: predicting young-adult smoking outcomes from adolescent smoking patterns. *Health Psychol* 1990;**9**:701-716.
5. Gilman SE, Rende R, Boergers J, *et al*. Parental smoking and adolescent smoking initiation: an intergenerational perspective on tobacco control. *Pediatrics* 2009;**123**:274-281.
6. MacKinnon DP, Taborga MP, Morgan-Lopez AA. Mediation designs for tobacco prevention research. *Drug Alcohol Depend* 2002;**68** (Suppl 1):69-83.
7. Faggiano F, Vigna-Taglianti FD, Versino E, *et al*. School-based prevention for illicit drugs' use. *Prev Med* 2008;**46**:385-96.
8. Gottfredson DC, Wilson DB. Characteristics of effective school-based substance abuse prevention. *Prev Sci* 2003;**4**:27-38.
9. Flay BR. Approaches to substance use prevention utilizing school curriculum plus social environment change. *Addict Behav* 2000;**25**:861-885.

Formatted: German (Germany)

Deleted: ;

Formatted: German (Germany)

Deleted: ;

Deleted: Ross J, Hawkins J, Harris WA

Formatted: ... [1]

Deleted: ;

Formatted: ... [2]

Deleted: , ... [3]

Deleted: Asma S

Formatted: Font: Italic

Deleted: ;

Formatted: ... [4]

Deleted: , ... [5]

Deleted: Edwards DA:

Formatted: ... [6]

Deleted: , ... [7]

Formatted: Font: Italic

Deleted: Abrams DB, Buka SL, Clark MA

Formatted: Font: Italic

Deleted: ;

Formatted: Font: Not Bold

Deleted: , ...e...e [8]

Deleted: ;

Formatted: ... [9]

Deleted: , ... [10]

Formatted: ... [11]

Deleted: S...S [12]

Deleted: Zambon A, Borraccino A, Lemma P:

Formatted: ... [13]

Deleted: Cochrane Database Syst Rev 2005, CD003020.

Deleted: :... [14]

Formatted: Font: Not Bold

Deleted: , ... [15]

Deleted: ;

Formatted: Font: Not Bold

Deleted: , ... [16]

1  
2  
3  
4  
5  
6  
7  
8  
9  
10  
11  
12  
13  
14  
15  
16  
17  
18  
19  
20  
21  
22  
23  
24  
25  
26  
27  
28  
29  
30  
31  
32  
33  
34  
35  
36  
37  
38  
39  
40  
41  
42  
43  
44  
45  
46  
47  
48  
49  
50  
51  
52  
53  
54  
55  
56  
57  
58  
59  
60

10. Flay BR. School-based smoking prevention programs with the promise of long-term effects. *Tob Induced Dis* 2009;**5**:6.

11. Foxcroft DR, Tsertsvadze A. Universal school-based prevention programs for alcohol misuse in young people. *Cochrane Database Syst Rev* 2011;**11**:CD009113.

12. Flay BR. The promise of long-term effectiveness of school-based smoking prevention programs: a critical review of reviews. *Tob Induced Dis* 2009;**5**:7.

13. WHO. *Life skills education in schools, parts 1 and 2*. Geneva: WHO, Division of Mental Health;1994.

14. Gorman DM. The "science" of drug and alcohol prevention: the case of the randomized trial of the Life Skills Training program. *Int J Drug Policy* 2002;**13**:21-26.

15. Peterson AV, Kealey KA, Mann SL, *et al*. Hutchinson Smoking Prevention Project: long-term randomized trial in school-based tobacco use prevention--results on smoking. *J Natl Cancer Inst* 2000;**92**:1979-1991.

16. Wiehe SE, Garrison MM, Christakis DA, *et al*. A systematic review of school-based smoking prevention trials with long-term follow-up. *J Adolesc Health* 2005;**36**:162-169.

17. Cuijpers P. Effective ingredients of school-based drug prevention programs. A systematic review. *Addict Behav* 2002;**27**:1009-1023.

18. Cuijpers P. Three decades of drug prevention research. *Drug Educ Prev Pol* 2003;**10**:7-20.

19. Hansen WB, Dusenbury L, Bishop D, *et al*. Substance abuse prevention program content: systematizing the classification of what programs target for change. *Health Educ Res* 2007;**22**:351-360.

20. Campbell MJ, Donner A, Klar N. Developments in cluster randomized trials and Statistics in Medicine. *Stat Med* 2007;**26**:2-19.

21. Murray DM, Varnell SP, Blitstein JL. Design and analysis of group-randomized trials: a review of recent methodological developments. *Am J Public Health* 2004;**94**:423-432.

Deleted: :  
Formatted: Font: Not Bold  
Deleted: , ... [17]

Deleted: :  
Formatted: ... [18]  
Deleted: 2011, 5: CD009113.¶

Deleted: :  
Formatted: ... [19]  
Deleted: , ... [20]

Deleted: :  
Formatted: Font: Italic  
Deleted: ;

Deleted: :  
Formatted: Font: Not Bold  
Deleted: , ... [21]

Deleted: Jr... Marek PM, Sar... [22]  
Formatted: ... [23]  
Deleted: , ... [24]

Deleted: Ebel BE, Rivara FP:  
Formatted: ... [25]  
Deleted: , ... [26]

Deleted: :  
Formatted: Font: Not Bold  
Deleted: , ... [27]

Formatted: ... [28]  
Deleted: olic  
Formatted: Font: Italic  
Deleted: , ... [29]

Deleted: Derzon JH  
Formatted: Font: Italic  
Deleted: :  
Formatted: ... [30]  
Deleted: , ... [31]

Formatted: German (Germany)  
Deleted: :  
Formatted: Font: Not Bold  
Deleted: , ... [32]  
Deleted: :  
Formatted: ... [33]  
Deleted: , ... [34]

- 1  
2  
3  
4  
5  
6  
7  
8  
9  
10  
11  
12  
13  
14  
15  
16  
17  
18  
19  
20  
21  
22  
23  
24  
25  
26  
27  
28  
29  
30  
31  
32  
33  
34  
35  
36  
37  
38  
39  
40  
41  
42  
43  
44  
45  
46  
47  
48  
49  
50  
51  
52  
53  
54  
55  
56  
57  
58  
59  
60
22. Faggiano F, Richardson C, Bohrn K, *et al.* A cluster randomized controlled trial of school-based prevention of tobacco, alcohol and drug use: the EU-Dap design and study population. *Prev Med* 2007;**44**:170-173.
23. Murray DM, Hannan PJ. Planning for the appropriate analysis in school-based drug-use prevention studies. *J Consult Clin Psychol* 1990;**58**:458-468.
24. Campbell MK, Thomson S, Ramsay CR, *et al.* Sample size calculator for cluster randomized trials. *Comput Biol Med* 2004;**34**:113-125.
25. Bundeszentrale für gesundheitliche Aufklärung. *Förderung des Nichtrauchens bei Jugendlichen 2007. Eine Repräsentativbefragung der Bundeszentrale für gesundheitliche Aufklärung.* Köln: BZgA, 2007.
26. Lampert T, Thamm M. Tabak-, Alkohol- und Drogenkonsum von Jugendlichen in Deutschland. Ergebnisse des Kinder und Jugendgesundheitssurveys (KiGGS). *Bundesgesundheitsblatt Gesundheitsforschung Gesundheitsschutz* 2007;**50**:600-608.
27. Bühler A, Schröder E, Silbereisen RK. The role of life skills promotion in substance abuse prevention: a mediation analysis. *Health Educ Res* 2008;**23**:621-632.
28. Jerusalem M, Drössler S, Kleine D, *et al.* Skalen zur Erfassung von Lehrer- und Schülermerkmalen. *Förderung von Selbstwirksamkeit und Selbstbestimmung im Unterricht.* Berlin: Humboldt-Universität zu Berlin Lehrstuhl für Pädagogische Psychologie und Gesundheitspsychologie, 2009.
29. Currie C, Molcho M, Boyce W, *et al.* Researching health inequalities in adolescents: the development of the Health Behaviour in School-Aged Children (HBSC) family affluence scale. *Soc Sci Med* 2008;**66**:1429-1436.
30. Collani von G, Herzberg PY. Eine revidierte Fassung der deutschsprachigen Skala zum Selbstwertgefühl von Rosenberg. *Zeitschrift für Differentielle und Diagnostische Psychologie* 2003;**24**:3-7.
- Deleted: Galanti MR:  
Formatted ... [35]  
Deleted: , ... [36]  
Deleted: :  
Formatted: Font: Not Bold  
Deleted: , ... [37]  
Deleted: MacLennan GS, Grimshaw JM:  
Formatted ... [38]  
Deleted: , ... [39]  
Formatted: German (Germany)  
Deleted: ... [40]  
Formatted ... [41]  
Deleted: ;  
Deleted: :  
Formatted ... [42]  
Deleted: ,  
Formatted: German (Germany)  
Deleted:  
Deleted: :  
Formatted ... [43]  
Deleted: Health Educ Res 2007, Epub ahead of print.  
Formatted: German (Germany)  
Deleted: Klein-Heßling J, Mittag W, Röder B:  
Formatted ... [44]  
Deleted: ;  
Deleted: ¶  
Holstein B, Torsheim T, Richt ... [45]  
Formatted ... [46]  
Deleted: , ... [47]  
Deleted: :  
Formatted ... [48]  
Deleted: , ... [49]

1  
2  
3  
4  
5  
6  
7  
8  
9  
10  
11  
12  
13  
14  
15  
16  
17  
18  
19  
20  
21  
22  
23  
24  
25  
26  
27  
28  
29  
30  
31  
32  
33  
34  
35  
36  
37  
38  
39  
40  
41  
42  
43  
44  
45  
46  
47  
48  
49  
50  
51  
52  
53  
54  
55  
56  
57  
58  
59  
60

31. World Health Organisation. *Guidelines for controlling and monitoring the tobacco epidemic*. Geneva: World Health Organisation, 1998.

32. Biglan A, Severson H, Ary D, *et al*. Do smoking prevention programs really work? Attrition and the internal and external validity of an evaluation of a refusal skills training program. *J Behav Med* 1987;**10**:159-171.

33. Jackson C, Henriksen L, Foshee VA. The Authoritative Parenting Index: predicting health risk behaviors among children and adolescents. *Health Educ Behav* 1998;**25**:319-337.

34. Prochaska JJ, Sallis JF, Long B. A physical activity screening measure for use with adolescents in primary care. *Arch Pediatr Adolesc Med* 2001;**155**:554-559.

35. Kraus L, Pabst A, Steiner S. *Europäische Schülerstudie zu Alkohol und anderen Drogen 2007 (ESPAD). Befragung von Schülerinnen und Schülern der 9. und 10. Klasse in Bayern, Berlin, Brandenburg, Hessen, Mecklenburg-Vorpommern, Saarland und Thüringen*. IFT München, 2008.

36. Stephenson MT, Hoyle RH, Palmgreen P, *et al*. Brief measures of sensation seeking for screening and large-scale surveys. *Drug Alcohol Depend* 2003;**72**:279-286.

37. Burt RD, Dinh KT, Peterson AV, *et al*. Predicting adolescent smoking: a prospective study of personality variables. *Prev Med* 2000;**30**:115-125.

38. Schneider S, Janßen M, Röhrig S, *et al*. "Warum nicht?" - Inhaltsanalyse der Motivangaben zum Rauchverzicht von über 700 Schülern: SToP-Studie 2008. *Deut Med Wochenschr*, 2009;**134**:1573-1577.

39. Lukesch H. *Fragebogen zur Erfassung von Empathie, Prosozialität, Aggressionsbereitschaft und aggressivem Verhalten; FEPA*. Göttingen [u.a.]: Hogrefe, 2006.

40. Pierce JP, Choi WS, Gilpin EA, *et al*. Validation of susceptibility as a predictor of which adolescents take up smoking in the United States. *Health Psychol* 1996;**15**:355-361.

Deleted: ;  
Formatted: Font: Italic  
Deleted: ;  
Formatted: Font: Italic  
Deleted: Faller C, Gallison C, Thompson R  
Formatted: Font: Italic  
Deleted: ;  
Formatted ... [50]  
Deleted: , ... [51]  
Deleted: ;  
Formatted ... [52]  
Deleted: , ... [53]  
Deleted: ;  
Formatted ... [54]  
Deleted: , ... [55]  
Deleted: Edited by Bundesministerium für Gesundheit. 2008. Institut für Therapie, ... IFT-Berichte Bd. 165. ... [56]  
Deleted: Slater MD:  
Formatted ... [57]  
Deleted: , ... [58]  
Deleted: Jr., Sarason IG:  
Formatted ... [59]  
Deleted: , ... [60]  
Deleted: Schüssler M, Solle D:  
Formatted ... [61]  
Deleted: tsch  
Formatted ... [62]  
Deleted: , ... [63]  
Deleted: ... [64]  
Formatted: Font: Italic, German (Germany)  
Deleted: ;  
Deleted: Merritt RK, Farkas AJ:  
Formatted ... [65]  
Deleted: , ... [66]

1  
2  
3  
4  
5  
6  
7  
8  
9  
10  
11  
12  
13  
14  
15  
16  
17  
18  
19  
20  
21  
22  
23  
24  
25  
26  
27  
28  
29  
30  
31  
32  
33  
34  
35  
36  
37  
38  
39  
40  
41  
42  
43  
44  
45  
46  
47  
48  
49  
50  
51  
52  
53  
54  
55  
56  
57  
58  
59  
60

41. Grob A, Smolenski C. *Fragebogen zur Erhebung der Emotionsregulation bei Kindern und Jugendlichen*. FEEL-KJ. Bern [u.a.]: Huber, 2005.

Deleted: ... [67]

Deleted: ;

Formatted: German (Germany)

42. Epstein JA, Botvin GJ. Media resistance skills and drug skill refusal techniques: What is their relationship with alcohol use among inner-city adolescents? *Addict Behav* 2008;**33**:528-537.

Deleted: :

Formatted: ... [68]

Deleted: , ... [69]

43. Olweus D. Bully/victim problems among schoolchildren: basic facts and effects of a school-based intervention program. In Pepler DJ, Rubnin KH, eds. *The development and treatment of childhood aggression*. Hillsday, New Jersey: Lawrence Erlbaum Associates, 1991:411-448.

Deleted: :

Formatted: Font: Not Bold

Deleted:

Formatted: ... [70]

Deleted: Edited by Pepler DJ, Rubnin KH. ...; [71]

44. Solberg ME, Olweus D. Prevalence Estimation of School Bullying With the Olweus Bully/Victim Questionnaire. *Aggress Behav* 2003;**29**:239-268.

Deleted: :

Formatted: Font: Not Bold

Deleted: , ... [72]

45. Hampel P, Petermann F, Dickow B. *SVF-KJ: Stressverarbeitungsfragebogen von Janke und Erdmann, angepasst für Kinder und Jugendliche*. Göttingen [u.a.]: Hogrefe, 2001.

Deleted: :

Formatted: ... [73]

Deleted: ; ... [74]

46. Donaldson SI, Graham JW, Piccinin AM, et al. Resistance-skills training and onset of alcohol use: evidence for beneficial and potentially harmful effects in public schools and in private Catholic schools. *Health Psychol* 1995;**14**:291-300.

Deleted: Hansen WB:

Formatted: ... [75]

Deleted: , ... [76]

Formatted: German (Germany)

Deleted: :

47. Raschke P, Kalke J. Haben Eltern Einfluss auf das Rauchverhalten ihrer Kinder? *Prävention* 2005;**28**:18-21.

Formatted: ... [77]

Deleted: ,

Formatted: German (Germany)

Deleted:

48. van der Vorst H, Engels RC, Meeus W, et al. The role of alcohol-specific socialization in adolescents' drinking behaviour. *Addiction* 2005;**100**:1464-1476.

Deleted: Dekovic M, van Leeuwe J:

Formatted: ... [78]

Deleted: , ... [79]

49. Galanti MR, Siliquini R, Cuomo L, et al. Testing anonymous link procedures for follow-up of adolescents in a school-based trial: The EU-DAP pilot study. *Prev Med* 2007;**44**:174-177.

Deleted: Melero JC, Panella M, Faggiano F:

Formatted: ... [80]

Deleted: , ... [81]

Formatted: Font: Italic

Deleted: Snow MG:

50. Velicer WF, Prochaska JO, Rossi JS, et al. Assessing outcome in smoking cessation studies. *Psychol Bull* 1992;**111**:23-41.

Formatted: ... [82]

Deleted: ,

Formatted: Font: Not Bold

Deleted:

## List of abbreviations

ICC: Intra-class coefficient, WHO: World Health Organization, Cl: Classes, Sch: School

## Copyright

The Corresponding Author has the right to grant on behalf of all authors and does grant on behalf of all authors, an exclusive licence (or non-exclusive for government employees) on a worldwide basis to the BMJ Group and co-owners or contracting owning societies (where published by the BMJ Group on their behalf), and its Licensees to permit this article (if accepted) to be published in BMJ Open and any other BMJ Group products and to exploit all subsidiary rights, as set out in our licence.

Deleted: ¶

Deleted: .....



1  
2  
3  
4  
5  
6  
7  
8  
9  
10  
11  
12  
13  
14  
15  
16  
17  
18  
19  
20  
21  
22  
23  
24  
25  
26  
27  
28  
29  
30  
31  
32  
33  
34  
35  
36  
37  
38  
39  
40  
41  
42  
43  
44  
45  
46  
47  
48  
49  
50  
51  
52  
53  
54  
55  
56  
57  
58  
59  
60

**Figure legends**

Figure 1. Flowchart.

For peer review only

|    |                                |               |                             |
|----|--------------------------------|---------------|-----------------------------|
| 1  |                                |               |                             |
| 2  |                                |               |                             |
| 3  | <b>Page 22: [1] Formatted</b>  | <b>hansen</b> | <b>9/21/2011 8:52:00 AM</b> |
| 4  | Font: Italic, German (Germany) |               |                             |
| 5  |                                |               |                             |
| 6  | <b>Page 22: [1] Formatted</b>  | <b>hansen</b> | <b>9/21/2011 8:52:00 AM</b> |
| 7  | German (Germany)               |               |                             |
| 8  |                                |               |                             |
| 9  | <b>Page 22: [1] Formatted</b>  | <b>hansen</b> | <b>9/21/2011 8:52:00 AM</b> |
| 10 | Font: Italic, German (Germany) |               |                             |
| 11 |                                |               |                             |
| 12 | <b>Page 22: [2] Formatted</b>  | <b>hansen</b> | <b>9/21/2011 8:46:00 AM</b> |
| 13 | German (Germany)               |               |                             |
| 14 |                                |               |                             |
| 15 | <b>Page 22: [2] Formatted</b>  | <b>hansen</b> | <b>9/21/2011 7:35:00 AM</b> |
| 16 | Font: Not Bold                 |               |                             |
| 17 |                                |               |                             |
| 18 |                                |               |                             |
| 19 |                                |               |                             |
| 20 |                                |               |                             |
| 21 | <b>Page 22: [3] Deleted</b>    | <b>hansen</b> | <b>9/21/2011 7:42:00 AM</b> |
| 22 |                                |               |                             |
| 23 |                                |               |                             |
| 24 |                                |               |                             |
| 25 |                                |               |                             |
| 26 | <b>Page 22: [4] Formatted</b>  | <b>hansen</b> | <b>9/21/2011 7:36:00 AM</b> |
| 27 | Font: Not Bold                 |               |                             |
| 28 |                                |               |                             |
| 29 | <b>Page 22: [4] Formatted</b>  | <b>hansen</b> | <b>9/21/2011 8:52:00 AM</b> |
| 30 | Font: Italic                   |               |                             |
| 31 |                                |               |                             |
| 32 | <b>Page 22: [5] Deleted</b>    | <b>hansen</b> | <b>9/21/2011 7:39:00 AM</b> |
| 33 |                                |               |                             |
| 34 |                                |               |                             |
| 35 |                                |               |                             |
| 36 | <b>Page 22: [5] Deleted</b>    | <b>hansen</b> | <b>9/21/2011 7:42:00 AM</b> |
| 37 |                                |               |                             |
| 38 |                                |               |                             |
| 39 |                                |               |                             |
| 40 |                                |               |                             |
| 41 | <b>Page 22: [6] Formatted</b>  | <b>hansen</b> | <b>9/21/2011 8:53:00 AM</b> |
| 42 | Font: Italic                   |               |                             |
| 43 |                                |               |                             |
| 44 | <b>Page 22: [6] Formatted</b>  | <b>hansen</b> | <b>9/21/2011 7:36:00 AM</b> |
| 45 | Font: Not Bold                 |               |                             |
| 46 |                                |               |                             |
| 47 | <b>Page 22: [6] Formatted</b>  | <b>hansen</b> | <b>9/21/2011 8:52:00 AM</b> |
| 48 | Font: Italic                   |               |                             |
| 49 |                                |               |                             |
| 50 | <b>Page 22: [7] Deleted</b>    | <b>hansen</b> | <b>9/21/2011 7:39:00 AM</b> |
| 51 |                                |               |                             |
| 52 |                                |               |                             |
| 53 |                                |               |                             |
| 54 | <b>Page 22: [7] Deleted</b>    | <b>hansen</b> | <b>9/21/2011 7:42:00 AM</b> |
| 55 |                                |               |                             |
| 56 |                                |               |                             |
| 57 |                                |               |                             |
| 58 |                                |               |                             |
| 59 |                                |               |                             |
| 60 |                                |               |                             |

1  
2  
3 **Page 22: [8] Deleted** hansen 9/21/2011 7:39:00 AM  
4  
5 ,  
6  
7

8 **Page 22: [8] Deleted** hansen 9/21/2011 7:42:00 AM  
9  
10 e  
11  
12

13 **Page 22: [8] Deleted** hansen 9/21/2011 7:42:00 AM  
14  
15 e  
16  
17

18 **Page 22: [9] Formatted** hansen 9/21/2011 7:36:00 AM  
19  
20 Font: Not Bold

21 **Page 22: [9] Formatted** hansen 9/21/2011 8:53:00 AM  
22  
23 Font: Italic

24 **Page 22: [10] Deleted** hansen 9/21/2011 7:40:00 AM  
25  
26 ,  
27

28 **Page 22: [10] Deleted** hansen 9/21/2011 7:40:00 AM  
29  
30  
31  
32

33 **Page 22: [11] Formatted** hansen 9/21/2011 7:37:00 AM  
34  
35 Font: Not Bold

36 **Page 22: [11] Formatted** hansen 9/21/2011 7:37:00 AM  
37  
38 Font: Not Bold

39 **Page 22: [12] Deleted** hansen 9/21/2011 7:42:00 AM  
40  
41 S  
42

43 **Page 22: [12] Deleted** hansen 9/21/2011 7:42:00 AM  
44  
45 S  
46  
47

48 **Page 22: [13] Formatted** hansen 9/21/2011 8:53:00 AM  
49  
50 Font: Italic

51 **Page 22: [13] Formatted** hansen 9/21/2011 7:37:00 AM  
52  
53 Font: Not Bold

54 **Page 22: [13] Formatted** hansen 9/21/2011 8:53:00 AM  
55  
56 Default Paragraph Font, Font: Italic, English (U.K.)

57 **Page 22: [13] Formatted** hansen 9/21/2011 8:46:00 AM  
58  
59 English (U.K.)  
60

1  
2  
3 **Page 22: [13] Formatted** hansen 9/21/2011 8:58:00 AM  
4 Font: Bold, English (U.K.)

5  
6 **Page 22: [13] Formatted** hansen 9/21/2011 8:46:00 AM  
7 English (U.K.)

8 **Page 22: [14] Deleted** hansen 9/21/2011 8:53:00 AM  
9 :

10  
11  
12  
13 **Page 22: [14] Deleted** hansen 9/21/2011 8:53:00 AM

14  
15  
16  
17  
18 **Page 22: [15] Deleted** hansen 9/21/2011 7:40:00 AM  
19 ,

20  
21  
22  
23 **Page 22: [15] Deleted** hansen 9/21/2011 7:40:00 AM

24  
25  
26  
27  
28 **Page 22: [15] Deleted** hansen 9/21/2011 7:42:00 AM

29  
30  
31  
32  
33 **Page 22: [16] Deleted** hansen 9/21/2011 7:41:00 AM  
34 ,

35  
36  
37  
38 **Page 22: [16] Deleted** hansen 9/21/2011 7:41:00 AM

39  
40  
41  
42  
43 **Page 23: [17] Deleted** hansen 9/21/2011 7:41:00 AM  
44 ,

45  
46  
47  
48 **Page 23: [17] Deleted** hansen 9/21/2011 7:41:00 AM

49  
50  
51  
52  
53 **Page 23: [18] Formatted** hansen 9/21/2011 7:43:00 AM  
54 Font: Not Bold

55  
56 **Page 23: [18] Formatted** hansen 9/21/2011 7:44:00 AM  
57 English (U.K.)  
58  
59  
60

1  
2  
3 **Page 23: [18] Formatted** hansen 9/21/2011 8:58:00 AM

4 Font: Bold, English (U.K.)

5  
6 **Page 23: [18] Formatted** hansen 9/21/2011 7:44:00 AM

7 English (U.K.)

8 **Page 23: [19] Formatted** hansen 9/21/2011 7:44:00 AM

9 Font: Not Bold

10  
11 **Page 23: [19] Formatted** hansen 9/21/2011 8:54:00 AM

12 Font: Italic

13 **Page 23: [20] Deleted** hansen 9/21/2011 7:44:00 AM

14 ,

15  
16  
17  
18 **Page 23: [20] Deleted** hansen 9/21/2011 7:45:00 AM

19  
20  
21  
22  
23 **Page 23: [21] Deleted** hansen 9/21/2011 7:46:00 AM

24 ,

25  
26  
27  
28 **Page 23: [21] Deleted** hansen 9/21/2011 7:47:00 AM

29  
30  
31  
32  
33 **Page 23: [21] Deleted** hansen 9/21/2011 7:47:00 AM

34  
35  
36  
37  
38 **Page 23: [22] Deleted** hansen 9/21/2011 8:55:00 AM

39 Jr

40  
41  
42  
43 **Page 23: [22] Deleted** hansen 9/21/2011 7:47:00 AM

44 *Marek PM, Sarason IG:*

45  
46  
47  
48 **Page 23: [23] Formatted** hansen 9/21/2011 8:55:00 AM

49 Font: Italic

50  
51 **Page 23: [23] Formatted** hansen 9/21/2011 7:47:00 AM

52 Font: Not Bold

53  
54 **Page 23: [24] Deleted** hansen 9/21/2011 7:47:00 AM

55 ,

1  
2  
3 **Page 23: [24] Deleted** hansen 9/21/2011 7:47:00 AM  
4  
5  
6  
7

8 **Page 23: [25] Formatted** hansen 9/21/2011 8:55:00 AM  
9 Font: Italic

10 **Page 23: [25] Formatted** hansen 9/21/2011 7:48:00 AM  
11 Font: Not Bold

12 **Page 23: [26] Deleted** hansen 9/21/2011 7:48:00 AM  
13  
14  
15  
16  
17

18 **Page 23: [26] Deleted** hansen 9/21/2011 7:48:00 AM  
19  
20  
21  
22

23 **Page 23: [27] Deleted** hansen 9/21/2011 7:48:00 AM  
24  
25  
26  
27

28 **Page 23: [27] Deleted** hansen 9/21/2011 7:48:00 AM  
29  
30  
31  
32

33 **Page 23: [27] Deleted** hansen 9/21/2011 7:48:00 AM  
34  
35  
36  
37

38 **Page 23: [28] Formatted** hansen 9/21/2011 7:48:00 AM  
39 Font: Not Bold

40 **Page 23: [28] Formatted** hansen 9/21/2011 8:56:00 AM  
41 Font: Italic

42 **Page 23: [29] Deleted** hansen 9/21/2011 7:48:00 AM  
43  
44  
45  
46  
47

48 **Page 23: [29] Deleted** hansen 9/21/2011 7:48:00 AM  
49  
50  
51  
52

53 **Page 23: [30] Formatted** hansen 9/21/2011 7:57:00 AM  
54 Font: Not Bold

55 **Page 23: [30] Formatted** hansen 9/21/2011 8:56:00 AM  
56 Font: Italic  
57  
58  
59  
60

1  
2  
3 **Page 23: [31] Deleted** hansen 9/21/2011 7:57:00 AM  
4  
5 ,  
6  
7

8 **Page 23: [31] Deleted** hansen 9/21/2011 7:57:00 AM  
9  
10

11  
12  
13 **Page 23: [32] Deleted** hansen 9/21/2011 7:59:00 AM  
14  
15 ,  
16

17  
18 **Page 23: [32] Deleted** hansen 9/21/2011 7:59:00 AM  
19  
20

21  
22  
23 **Page 23: [32] Deleted** hansen 9/21/2011 7:59:00 AM  
24  
25

26  
27  
28 **Page 23: [33] Formatted** hansen 9/21/2011 7:59:00 AM  
29  
30 Font: Not Bold

31 **Page 23: [33] Formatted** hansen 9/21/2011 8:56:00 AM  
32  
33 Font: Italic

34 **Page 23: [34] Deleted** hansen 9/21/2011 7:59:00 AM  
35  
36 ,  
37

38 **Page 23: [34] Deleted** hansen 9/21/2011 7:59:00 AM  
39  
40

41  
42  
43 **Page 24: [35] Formatted** hansen 9/21/2011 8:57:00 AM  
44  
45 Font: Italic

46 **Page 24: [35] Formatted** hansen 9/21/2011 8:00:00 AM  
47  
48 Font: Not Bold

49 **Page 24: [35] Formatted** hansen 9/21/2011 8:57:00 AM  
50  
51 Font: Italic

52 **Page 24: [36] Deleted** hansen 9/21/2011 8:00:00 AM  
53  
54 ,  
55

56 **Page 24: [36] Deleted** hansen 9/21/2011 8:00:00 AM  
57  
58  
59  
60

1  
2  
3  
4  
5 **Page 24: [37] Deleted** hansen 9/21/2011 8:00:00 AM  
6  
7  
8

9  
10 **Page 24: [37] Deleted** hansen 9/21/2011 8:00:00 AM  
11  
12  
13

14  
15 **Page 24: [38] Formatted** hansen 9/21/2011 8:58:00 AM  
16

Font: Italic

17 **Page 24: [38] Formatted** hansen 9/21/2011 8:01:00 AM  
18

Font: Not Bold

19  
20 **Page 24: [39] Deleted** hansen 9/21/2011 8:01:00 AM  
21  
22  
23

24  
25 **Page 24: [39] Deleted** hansen 9/21/2011 8:01:00 AM  
26  
27  
28

29  
30 **Page 24: [40] Deleted** hansen 9/21/2011 8:01:00 AM  
31  
32  
33

34  
35 **Page 24: [40] Deleted** hansen 9/21/2011 8:01:00 AM  
36  
37  
38

39  
40 **Page 24: [41] Formatted** hansen 9/21/2011 8:57:00 AM  
41

Font: Italic, German (Germany)

42 **Page 24: [41] Formatted** hansen 9/21/2011 8:57:00 AM  
43

German (Germany)

44  
45 **Page 24: [42] Formatted** hansen 9/21/2011 8:01:00 AM  
46

German (Germany)

47 **Page 24: [42] Formatted** hansen 9/21/2011 8:57:00 AM  
48

Font: Not Bold, German (Germany)

49  
50 **Page 24: [42] Formatted** hansen 9/21/2011 8:01:00 AM  
51

German (Germany)

52  
53 **Page 24: [43] Formatted** hansen 9/21/2011 8:02:00 AM  
54

Font: Not Bold

55 **Page 24: [43] Formatted** hansen 9/21/2011 8:58:00 AM  
56

Font: Italic

57  
58 **Page 24: [43] Formatted** hansen 9/21/2011 8:58:00 AM  
59  
60



1  
2  
3 English (U.K.)  
4

5 **Page 24: [43] Formatted** hansen 9/21/2011 8:58:00 AM

6 Font: Bold

7 **Page 24: [44] Formatted** hansen 9/21/2011 8:58:00 AM

8 Font: Italic, German (Germany)

9 **Page 24: [44] Formatted** hansen 9/21/2011 8:03:00 AM

10 German (Germany)

11 **Page 24: [44] Formatted** hansen 9/21/2011 9:13:00 AM

12 Font: Italic, German (Germany)

13 **Page 24: [44] Formatted** hansen 9/21/2011 8:46:00 AM

14 German (Germany)

15 **Page 24: [45] Deleted** hansen 9/21/2011 8:03:00 AM

16  
17  
18  
19  
20  
21 **Page 24: [45] Deleted** hansen 9/21/2011 8:04:00 AM

22 *Holstein B, Torsheim T, Richter M:*

23  
24  
25  
26 **Page 24: [46] Formatted** hansen 9/21/2011 8:59:00 AM

27 Font: Italic

28 **Page 24: [46] Formatted** hansen 9/21/2011 8:04:00 AM

29 Font: Not Bold

30 **Page 24: [46] Formatted** hansen 9/21/2011 8:59:00 AM

31 German (Germany)

32 **Page 24: [47] Deleted** hansen 9/21/2011 8:04:00 AM

33  
34  
35  
36  
37  
38

39 **Page 24: [47] Deleted** hansen 9/21/2011 8:04:00 AM

40  
41  
42  
43  
44 **Page 24: [48] Formatted** hansen 9/21/2011 8:04:00 AM

45 Font: Not Bold, German (Germany)

46 **Page 24: [48] Formatted** hansen 9/21/2011 8:35:00 AM

47 German (Germany)

48 **Page 24: [49] Deleted** hansen 9/21/2011 8:04:00 AM

49  
50  
51  
52  
53

54 **Page 24: [49] Deleted** hansen 9/21/2011 8:04:00 AM

1  
2  
3 **Page 25: [50] Formatted** hansen 9/21/2011 8:19:00 AM

4 Font: Not Bold

5  
6 **Page 25: [50] Formatted** hansen 9/21/2011 8:59:00 AM

7 Font: Italic

8 **Page 25: [51] Deleted** hansen 9/21/2011 8:19:00 AM

9 ,

10  
11  
12  
13 **Page 25: [51] Deleted** hansen 9/21/2011 8:19:00 AM

14  
15  
16  
17  
18 **Page 25: [52] Formatted** hansen 9/21/2011 8:35:00 AM

19 Font: Not Bold

20 **Page 25: [52] Formatted** hansen 9/21/2011 9:00:00 AM

21 Font: Italic

22 **Page 25: [53] Deleted** hansen 9/21/2011 8:19:00 AM

23 ,

24  
25  
26  
27  
28 **Page 25: [53] Deleted** hansen 9/21/2011 8:19:00 AM

29  
30  
31  
32  
33 **Page 25: [53] Deleted** hansen 9/21/2011 8:19:00 AM

34  
35  
36  
37  
38 **Page 25: [54] Formatted** hansen 9/21/2011 8:35:00 AM

39 Font: Not Bold

40 **Page 25: [54] Formatted** hansen 9/21/2011 9:00:00 AM

41 German (Germany)

42 **Page 25: [55] Deleted** hansen 9/21/2011 8:20:00 AM

43 ,

44  
45  
46  
47  
48 **Page 25: [55] Deleted** hansen 9/21/2011 8:20:00 AM

49  
50  
51  
52  
53 **Page 25: [56] Deleted** hansen 9/21/2011 8:21:00 AM

54 Edited by Bundesministerium für Gesundheit. 2008. Institut für Therapie,

1  
2  
3 **Page 25: [56] Deleted** hansen 9/21/2011 8:21:00 AM

4 . IFT-Berichte Bd. 165  
5  
6  
7

8 **Page 25: [56] Deleted** hansen 9/21/2011 8:21:00 AM  
9  
10  
11

12  
13 **Page 25: [57] Formatted** hansen 9/21/2011 9:01:00 AM

14 Font: Italic, German (Germany)  
15

16 **Page 25: [57] Formatted** hansen 9/21/2011 8:35:00 AM

17 Font: Not Bold  
18

19 **Page 25: [58] Deleted** hansen 9/21/2011 8:21:00 AM  
20  
21  
22

23 **Page 25: [58] Deleted** hansen 9/21/2011 8:21:00 AM  
24  
25  
26  
27

28 **Page 25: [59] Formatted** hansen 9/21/2011 9:03:00 AM

29 Font: Italic  
30

31 **Page 25: [59] Formatted** hansen 9/21/2011 8:28:00 AM

32 Font: Not Bold  
33

34 **Page 25: [59] Formatted** hansen 9/21/2011 9:03:00 AM

35 German (Germany)  
36

37 **Page 25: [60] Deleted** hansen 9/21/2011 8:28:00 AM  
38  
39  
40

41 **Page 25: [60] Deleted** hansen 9/21/2011 8:28:00 AM  
42  
43  
44  
45

46 **Page 25: [61] Formatted** hansen 9/21/2011 9:03:00 AM

47 Font: Italic, German (Germany)  
48

49 **Page 25: [61] Formatted** hansen 9/21/2011 9:03:00 AM

50 Font: Italic  
51

52 **Page 25: [61] Formatted** hansen 9/21/2011 8:28:00 AM

53 German (Germany)  
54

55 **Page 25: [61] Formatted** hansen 9/21/2011 9:03:00 AM

56 Font: Not Bold, German (Germany)  
57

58 **Page 25: [61] Formatted** hansen 9/21/2011 8:28:00 AM  
59  
60

German (Germany)

1  
2  
3 **Page 25: [62] Formatted** hansen 9/21/2011 9:04:00 AM  
4 Font: Italic, German (Germany)

5  
6 **Page 25: [62] Formatted** hansen 9/21/2011 8:46:00 AM  
7 German (Germany)

8 **Page 25: [63] Deleted** hansen 9/21/2011 8:28:00 AM  
9  
10 ,

11  
12  
13 **Page 25: [63] Deleted** hansen 9/21/2011 8:28:00 AM  
14

15  
16  
17  
18 **Page 25: [63] Deleted** hansen 9/21/2011 8:28:00 AM  
19

20  
21  
22  
23 **Page 25: [64] Deleted** hansen 9/21/2011 8:30:00 AM  
24 :  
25  
26  
27

28 **Page 25: [64] Deleted** hansen 9/21/2011 9:04:00 AM  
29  
30  
31  
32

33 **Page 25: [65] Formatted** hansen 9/21/2011 9:04:00 AM  
34 Font: Italic  
35

36 **Page 25: [65] Formatted** hansen 9/21/2011 8:30:00 AM  
37 Font: Not Bold  
38

39 **Page 25: [65] Formatted** hansen 9/21/2011 9:04:00 AM  
40 German (Germany)

41 **Page 25: [66] Deleted** hansen 9/21/2011 8:31:00 AM  
42  
43 ,  
44  
45

46 **Page 25: [66] Deleted** hansen 9/21/2011 8:31:00 AM  
47  
48  
49  
50

51 **Page 25: [66] Deleted** hansen 9/21/2011 8:31:00 AM  
52  
53  
54  
55

56 **Page 26: [67] Deleted** hansen 9/21/2011 8:31:00 AM  
57 :  
58  
59  
60

1  
2  
3  
4  
5 **Page 26: [67] Deleted** hansen 9/21/2011 9:04:00 AM  
6  
7  
8

9  
10 **Page 26: [68] Formatted** hansen 9/21/2011 8:32:00 AM  
11 Font: Not Bold

12 **Page 26: [68] Formatted** hansen 9/21/2011 9:04:00 AM  
13 Font: Italic

14  
15 **Page 26: [69] Deleted** hansen 9/21/2011 8:31:00 AM  
16  
17  
18  
19

20 **Page 26: [69] Deleted** hansen 9/21/2011 8:31:00 AM  
21  
22  
23  
24

25 **Page 26: [69] Deleted** hansen 9/21/2011 8:32:00 AM  
26  
27  
28  
29

30 **Page 26: [70] Formatted** hansen 9/21/2011 9:05:00 AM  
31 Font: Italic

32 **Page 26: [70] Formatted** hansen 9/21/2011 9:05:00 AM  
33 Font: Italic

34  
35 **Page 26: [71] Deleted** hansen 9/21/2011 8:37:00 AM  
36 Edited by Pepler DJ, Rubnin KH.  
37  
38  
39

40 **Page 26: [71] Deleted** hansen 9/21/2011 8:37:00 AM  
41 ;  
42  
43  
44

45 **Page 26: [72] Deleted** hansen 9/21/2011 8:38:00 AM  
46 ,  
47  
48  
49

50 **Page 26: [72] Deleted** hansen 9/21/2011 8:38:00 AM  
51  
52  
53  
54

55 **Page 26: [73] Formatted** hansen 9/21/2011 9:05:00 AM  
56 German (Germany)

57 **Page 26: [73] Formatted** hansen 9/21/2011 9:05:00 AM  
58  
59  
60

1  
2  
3  
4  
5  
6  
7  
8  
9  
10  
11  
12  
13  
14  
15  
16  
17  
18  
19  
20  
21  
22  
23  
24  
25  
26  
27  
28  
29  
30  
31  
32  
33  
34  
35  
36  
37  
38  
39  
40  
41  
42  
43  
44  
45  
46  
47  
48  
49  
50  
51  
52  
53  
54  
55  
56  
57  
58  
59  
60

Font: Italic, German (Germany)

|                                |               |                             |
|--------------------------------|---------------|-----------------------------|
| <b>Page 26: [73] Formatted</b> | <b>hansen</b> | <b>9/21/2011 9:05:00 AM</b> |
|--------------------------------|---------------|-----------------------------|

German (Germany)

|                              |               |                             |
|------------------------------|---------------|-----------------------------|
| <b>Page 26: [74] Deleted</b> | <b>hansen</b> | <b>9/21/2011 8:38:00 AM</b> |
|------------------------------|---------------|-----------------------------|

;

|                              |               |                             |
|------------------------------|---------------|-----------------------------|
| <b>Page 26: [74] Deleted</b> | <b>hansen</b> | <b>9/21/2011 8:38:00 AM</b> |
|------------------------------|---------------|-----------------------------|

|                              |               |                             |
|------------------------------|---------------|-----------------------------|
| <b>Page 26: [74] Deleted</b> | <b>hansen</b> | <b>9/21/2011 8:38:00 AM</b> |
|------------------------------|---------------|-----------------------------|

|                                |               |                             |
|--------------------------------|---------------|-----------------------------|
| <b>Page 26: [75] Formatted</b> | <b>hansen</b> | <b>9/21/2011 9:05:00 AM</b> |
|--------------------------------|---------------|-----------------------------|

Font: Italic

|                                |               |                             |
|--------------------------------|---------------|-----------------------------|
| <b>Page 26: [75] Formatted</b> | <b>hansen</b> | <b>9/21/2011 8:38:00 AM</b> |
|--------------------------------|---------------|-----------------------------|

Font: Not Bold

|                                |               |                             |
|--------------------------------|---------------|-----------------------------|
| <b>Page 26: [75] Formatted</b> | <b>hansen</b> | <b>9/21/2011 9:05:00 AM</b> |
|--------------------------------|---------------|-----------------------------|

Font: Italic

|                              |               |                             |
|------------------------------|---------------|-----------------------------|
| <b>Page 26: [76] Deleted</b> | <b>hansen</b> | <b>9/21/2011 8:38:00 AM</b> |
|------------------------------|---------------|-----------------------------|

,

|                              |               |                             |
|------------------------------|---------------|-----------------------------|
| <b>Page 26: [76] Deleted</b> | <b>hansen</b> | <b>9/21/2011 8:38:00 AM</b> |
|------------------------------|---------------|-----------------------------|

|                                |               |                             |
|--------------------------------|---------------|-----------------------------|
| <b>Page 26: [77] Formatted</b> | <b>hansen</b> | <b>9/21/2011 8:38:00 AM</b> |
|--------------------------------|---------------|-----------------------------|

Font: Not Bold, German (Germany)

|                                |               |                             |
|--------------------------------|---------------|-----------------------------|
| <b>Page 26: [77] Formatted</b> | <b>hansen</b> | <b>9/21/2011 8:38:00 AM</b> |
|--------------------------------|---------------|-----------------------------|

German (Germany)

|                                |               |                             |
|--------------------------------|---------------|-----------------------------|
| <b>Page 26: [78] Formatted</b> | <b>hansen</b> | <b>9/21/2011 9:05:00 AM</b> |
|--------------------------------|---------------|-----------------------------|

Font: Italic, German (Germany)

|                                |               |                             |
|--------------------------------|---------------|-----------------------------|
| <b>Page 26: [78] Formatted</b> | <b>hansen</b> | <b>9/21/2011 9:05:00 AM</b> |
|--------------------------------|---------------|-----------------------------|

Font: Italic

|                                |               |                             |
|--------------------------------|---------------|-----------------------------|
| <b>Page 26: [78] Formatted</b> | <b>hansen</b> | <b>9/21/2011 9:05:00 AM</b> |
|--------------------------------|---------------|-----------------------------|

Font: Italic, German (Germany)

|                                |               |                             |
|--------------------------------|---------------|-----------------------------|
| <b>Page 26: [78] Formatted</b> | <b>hansen</b> | <b>9/21/2011 8:39:00 AM</b> |
|--------------------------------|---------------|-----------------------------|

Font: Not Bold

|                              |               |                             |
|------------------------------|---------------|-----------------------------|
| <b>Page 26: [79] Deleted</b> | <b>hansen</b> | <b>9/21/2011 8:39:00 AM</b> |
|------------------------------|---------------|-----------------------------|

,

1  
2  
3 **Page 26: [79] Deleted** hansen 9/21/2011 8:39:00 AM  
4  
5  
6  
7

8 **Page 26: [80] Formatted** hansen 9/21/2011 9:05:00 AM  
9  
10 Font: Italic

11 **Page 26: [80] Formatted** hansen 9/21/2011 8:39:00 AM  
12 Font: Not Bold

13 **Page 26: [81] Deleted** hansen 9/21/2011 8:39:00 AM  
14  
15  
16  
17

18 **Page 26: [81] Deleted** hansen 9/21/2011 8:39:00 AM  
19  
20  
21  
22

23 **Page 26: [81] Deleted** hansen 9/21/2011 8:39:00 AM  
24  
25  
26  
27

28 **Page 26: [82] Formatted** hansen 9/21/2011 8:39:00 AM  
29 Font: Not Bold

30 **Page 26: [82] Formatted** hansen 9/21/2011 9:06:00 AM  
31 Font: Italic  
32  
33  
34  
35  
36  
37  
38  
39  
40  
41  
42  
43  
44  
45  
46  
47  
48  
49  
50  
51  
52  
53  
54  
55  
56  
57  
58  
59  
60
